# Supplementary material for: Bureaucratic Control and Strategic Compliance: How Do Subnational Governments Implement Central Guidelines in China?
Source: Oxford University Press journal article supplement (doi:10.1093/jopart/muab030), 2021-07-21
Supplement: muab030_suppl_supplementary_data_s1.docx [file muab030_suppl_supplementary_data_s1.docx]

Information about the 42 Social Regulatory Central Guidelines

The table below presents the information about the 42 social regulatory central guidelines released by Chinese state council and its general office between 2003-2007. The full texts of the 42 central guidelines can be downloaded from pkulaw.cn.

- **Mobilization**=1 if an NTTC with the same topic of a central guideline is held in the same year when the central guideline is launched, 0 otherwise.
- **Monitoring**=1 if top–down inspection is mentioned in a central guideline, 0 otherwise.
- **Guideline Level**=1 if a central guideline is issued by the Chinese State Council rather than by the General Office of the State Council, 0 otherwise.
- **Policy Type**=1 if the policy belongs to safety inspection, 2 if commerce & product quality; 3 if land & natural resources; 4 if environment protection; 5 if healthcare.
- **Guideline Length (Words):** Number of words in a central guideline.
- **Topic Salience:** Frequency of the topic of a central guideline mentioned in other central guidelines in this year.
- **Degree of Control:** Percentage of the words which are from the bureaucratic control category in each central guideline.
- **Degree of Control (Expanded):** Percentage of the words which are in the expanded version of bureaucratic control category.

Table D1:

| **ID** | **Guideline Title**  **(in Chinese)** | **Release**  **Date** | **Mobilization** | **Monitoring** | **Guideline Level** | **Policy**  **Type** | **Guideline Length (words)** | **Topic Salience** | **Degree of Control** | **Degree of Control (Expanded)** |
| --- | --- | --- | --- | --- | --- | --- | --- | --- | --- | --- |
| 1 | 国务院办公厅关于进一步加强煤矿安全生产工作的通知 | 2003/6/20 | 1 | 1 | 0 | 1 | 1836 | 0.05408 | 0.00926 | 0.01636 |
| 2 | 国务院办公厅关于实施食品药品放心工程的通知 | 2003/7/16 | 1 | 1 | 0 | 2 | 2316 | 0.00306 | 0.00302 | 0.00691 |
| 3 | 国务院办公厅关于清理整顿各类开发区加强建设用地管理的通知 | 2003/7/30 | 1 | 1 | 0 | 3 | 1206 | 0.01144 | 0.01327 | 0.01993 |
| 4 | 国务院办公厅关于进一步做好农业标准化工作的通知 | 2003/12/8 | 0 | 0 | 0 | 2 | 2226 | 0.01359 | 0.00225 | 0.00494 |
| 5 | 国务院关于进一步加强安全生产工作的决定 | 2004/1/9 | 1 | 0 | 1 | 1 | 3931 | 0.16287 | 0.00280 | 0.01094 |
| 6 | 国务院关于切实加强艾滋病防治工作的通知 | 2004/3/16 | 0 | 0 | 1 | 5 | 3128 | 0.01734 | 0.00128 | 0.00416 |
| 7 | 国务院办公厅关于加强生物物种资源保护和管理的通知 | 2004/3/31 | 0 | 0 | 0 | 4 | 1916 | 0.01328 | 0.00365 | 0.00678 |
| 8 | 国务院办公厅关于开展资源节约活动的通知 | 2004/4/1 | 1 | 0 | 0 | 4 | 2556 | 0.08872 | 0.00117 | 0.00430 |
| 9 | 国务院办公厅关于进一步加强森林防火工作的通知 | 2004/4/14 | 0 | 0 | 0 | 1 | 2536 | 0.02522 | 0.00434 | 0.00670 |
| 10 | 国务院办公厅关于推进水价改革促进节约用水保护水资源的通知 | 2004/4/19 | 0 | 1 | 0 | 4 | 2720 | 0.01839 | 0.00147 | 0.00478 |
| 11 | 国务院关于做好省级以下国土资源管理体制改革有关问题的通知 | 2004/4/21 | 1 | 0 | 1 | 3 | 1012 | 0.04713 | 0.00889 | 0.02273 |
| 12 | 国务院关于进一步加强血吸虫病防治工作的通知 | 2004/5/13 | 0 | 0 | 1 | 5 | 2951 | 0.01379 | 0.00102 | 0.00271 |
| 13 | 国务院办公厅关于加强湿地保护管理的通知 | 2004/6/5 | 0 | 0 | 0 | 4 | 1468 | 0.02585 | 0.00681 | 0.01499 |
| 14 | 国务院办公厅关于加强中央企业安全生产工作的通知 | 2004/6/24 | 0 | 0 | 0 | 1 | 2100 | 0.01658 | 0.00238 | 0.01381 |
| 15 | 国务院关于进一步加强食品安全工作的决定 | 2004/9/1 | 1 | 1 | 1 | 2 | 3085 | 0.03539 | 0.00357 | 0.00778 |
| 16 | 国务院关于深化改革严格土地管理的决定 | 2004/10/21 | 1 | 0 | 1 | 3 | 4472 | 0.06886 | 0.01565 | 0.02460 |
| 17 | 国务院办公厅关于完善煤矿安全监察体制的意见 | 2004/11/4 | 0 | 0 | 0 | 1 | 956 | 0.00783 | 0.00000 | 0.00732 |
| 18 | 国务院关于推进兽医管理体制改革的若干意见 | 2005/5/14 | 0 | 0 | 1 | 5 | 2026 | 0.02184 | 0.00099 | 0.01086 |
| 19 | 国务院办公厅关于加强车辆超限超载治理工作的通知 | 2005/6/1 | 0 | 0 | 0 | 1 | 1844 | 0.00340 | 0.00922 | 0.01681 |
| 20 | 国务院办公厅关于进一步推进墙体材料革新和推广节能建筑的通知 | 2005/6/6 | 0 | 0 | 0 | 4 | 2353 | 0.00658 | 0.00722 | 0.01317 |
| 21 | 国务院关于做好建设节约型社会近期重点工作的通知 | 2005/6/27 | 1 | 0 | 1 | 4 | 4766 | 0.09951 | 0.00357 | 0.00546 |
| 22 | 国务院办公厅关于加强饮用水安全保障工作的通知 | 2005/8/17 | 0 | 0 | 0 | 5 | 1536 | 0.03140 | 0.00781 | 0.01107 |
| 23 | 国务院关于全面整顿和规范矿产资源开发秩序的通知 | 2005/8/18 | 0 | 1 | 1 | 3 | 3646 | 0.07467 | 0.00960 | 0.01947 |
| 24 | 国务院关于进一步加强防沙治沙工作的决定 | 2005/9/8 | 0 | 0 | 1 | 4 | 4703 | 0.01453 | 0.00659 | 0.01063 |
| 25 | 国务院办公厅关于印发《省级政府耕地保护责任目标考核办法》的通知 | 2005/10/28 | 0 | 1 | 0 | 3 | 922 | 0.05108 | 0.00542 | 0.01085 |
| 26 | 国务院关于落实科学发展观加强环境保护的决定 | 2005/12/3 | 1 | 1 | 1 | 4 | 6702 | 0.01236 | 0.00507 | 0.00881 |
| 27 | 国务院办公厅关于印发中国遏制与防治艾滋病行动计划（2006－2010年）的通知 | 2006/2/27 | 1 | 1 | 0 | 5 | 6422 | 0.02034 | 0.00062 | 0.00265 |
| 28 | 国务院关于进一步加强消防工作的意见 | 2006/5/10 | 1 | 0 | 1 | 1 | 3250 | 0.02673 | 0.00708 | 0.01662 |
| 29 | 国务院办公厅关于推进种子管理体制改革加强市场监管的意见 | 2006/5/19 | 0 | 0 | 0 | 2 | 2024 | 0.00357 | 0.00593 | 0.01532 |
| 30 | 国务院办公厅关于建立国家土地督察制度有关问题的通知 | 2006/7/13 | 0 | 0 | 0 | 3 | 1386 | 0.01637 | 0.00361 | 0.00649 |
| 31 | 国务院关于加强节能工作的决定 | 2006/8/6 | 0 | 1 | 1 | 4 | 4722 | 0.04184 | 0.00402 | 0.00657 |
| 32 | 国务院关于加强土地调控有关问题的通知 | 2006/8/31 | 0 | 1 | 1 | 3 | 1899 | 0.02637 | 0.01159 | 0.01790 |
| 33 | 国务院办公厅关于整顿和规范活禽经营市场秩序加强高致病性禽流感防控工作的意见 | 2006/11/20 | 0 | 0 | 0 | 2 | 1346 | 0.00000 | 0.00817 | 0.01189 |
| 34 | 国务院办公厅关于规范国有土地使用权出让收支管理的通知 | 2006/12/17 | 0 | 0 | 0 | 3 | 2823 | 0.00309 | 0.00602 | 0.01523 |
| 35 | 国务院办公厅关于进一步加强药品安全监管工作的通知 | 2007/3/31 | 1 | 0 | 0 | 2 | 1802 | 0.09370 | 0.00333 | 0.00777 |
| 36 | 国务院关于印发节能减排综合性工作方案的通知 | 2007/5/23 | 1 | 0 | 1 | 4 | 8986 | 0.11466 | 0.00323 | 0.00545 |
| 37 | 国务院办公厅关于严格执行公共建筑空调温度控制标准的通知 | 2007/6/1 | 0 | 0 | 0 | 4 | 966 | 0.00614 | 0.01242 | 0.01656 |
| 38 | 国务院办公厅关于进一步加强气象灾害防御工作的意见 | 2007/7/5 | 0 | 0 | 0 | 1 | 3042 | 0.03952 | 0.00000 | 0.00329 |
| 39 | 国务院办公厅关于建立政府强制采购节能产品制度的通知 | 2007/7/30 | 0 | 0 | 0 | 4 | 1658 | 0.02914 | 0.01508 | 0.01749 |
| 40 | 国务院关于加强产品质量和食品安全工作的通知 | 2007/8/5 | 1 | 0 | 1 | 2 | 2522 | 0.02727 | 0.00476 | 0.00872 |
| 41 | 国务院办公厅关于严格执行有关农村集体建设用地法律和政策的通知 | 2007/12/30 | 0 | 0 | 0 | 3 | 2089 | 0.04428 | 0.02872 | 0.04069 |
| 42 | 国务院办公厅关于限制生产销售使用塑料购物袋的通知 | 2007/12/31 | 0 | 0 | 0 | 4 | 1498 | 0.00183 | 0.00734 | 0.01001 |
