# Supplementary material for: Bureaucratic Control and Strategic Compliance: How Do Subnational Governments Implement Central Guidelines in China?
Source: Oxford University Press journal article supplement (doi:10.1093/jopart/muab030), 2021-07-21
Supplement: muab030_suppl_supplementary_data_s2.docx [file muab030_suppl_supplementary_data_s2.docx]

Information about the 848 Provincial Implementation Documents

The tables below present the information about the 848 provincial implementation documents corresponding to the 42 Chinese social regulatory central guidelines. The full texts of the 848 provincial implementation documents can be downloaded from pkulaw.cn.

Table C1:

| Provincial Documents Corresponding to Central Guideline #1:  国务院办公厅关于进一步加强煤矿安全生产工作的通知 | | | | |
| --- | --- | --- | --- | --- |
| ID | Title of the document | Release Date | Straight Measure of  Content Coverage | Refined Content Coverage after Removing Formulaic Sentences |
| 1 | 安徽省人民政府办公厅关于进一步加大煤矿安全生产工作力度的通知 | 2003年8月 | 0.23085 | 0.24500 |
| 2 | 北京市人民政府办公厅关于进一步加强煤矿安全生产工作的通知 | 2003年8月 | 0.09434 | 0.19500 |
| 3 | 福建省人民政府办公厅转发省煤矿安全生产专项工作领导小组办公室关于福建省2004年煤矿安全生产专项整治工作实施方案的通知 | 2004年5月 | 0.15982 | 0.16375 |
| 4 | 甘肃省人民政府办公厅批转甘肃煤矿安全监察局关于深入开展煤矿安全专项整治工作意见的通知 | 2004年6月 | 0.22420 | 0.23250 |
| 5 | 广西壮族自治区人民政府办公厅关于印发广西壮族自治区全面整顿和规范矿产资源开发秩序工作实施方案的通知 | 2005年11月 | 0.13319 | 0.14875 |
| 6 | 贵州省人民政府办公厅关于进一步加强煤矿安全生产和深化安全生产专项整治工作的通知 | 2003年8月 | 0.21421 | 0.22875 |
| 7 | 河北省人民政府办公厅关于进一步加强全省煤矿安全生产工作的通知 | 2003年7月 | 0.15094 | 0.32125 |
| 8 | 湖北省安全生产委员会关于印发《湖北省2004年深化煤矿安全生产专项整治实施意见》的通知 | 2004年3月 | 0.13541 | 0.14750 |
| 9 | 吉林省人民政府办公厅转发国务院办公厅关于进一步加强煤矿安全生产工作的通知 | 2003年8月 | 0.07214 | 0.13125 |
| 10 | 江西省人民政府办公厅转发国务院办公厅关于进一步加强煤矿安全生产工作的通知 | 2003年7月 | 0.13319 | 0.17250 |
| 11 | 辽宁省人民政府办公厅关于进一步加强煤矿安全生产工作的通知 | 2003年12月 | 0.14761 | 0.16000 |
| 12 | 内蒙古自治区人民政府关于进一步强化煤矿安全生产专项整治关闭不具备安全生产基本条件煤矿的决定 | 2004年5月 | 0.11987 | 0.14500 |
| 13 | 宁夏回族自治区人民政府办公厅关于进一步加强全区煤矿安全生产工作的通知 | 2003年7月 | 0.15205 | 0.19875 |
| 14 | 青海省人民政府办公厅关于加强煤矿安全监督管理进一步做好小煤矿关闭整顿工作的紧急通知 | 2004年11月 | 0.07991 | 0.11500 |
| 15 | 山东省人民政府办公厅关于加强煤矿安全生产工作的通知 | 2003年12月 | 0.18757 | 0.19875 |
| 16 | 山西省人民政府办公厅关于贯彻落实《国务院办公厅关于进一步加强煤矿安全生产工作的通知》的通知 | 2003年7月 | 0.10655 | 0.14250 |
| 17 | 新疆维吾尔自治区人民政府办公厅转发国务院办公厅关于进一步加强煤矿安全生产工作通知的通知 | 2003年7月 | 0.05993 | 0.07625 |
| 18 | 云南省人民政府办公厅转发国务院办公厅关于进一步加强煤矿安全生产工作文件的通知 | 2003年8月 | 0.23196 | 0.29500 |

Table C2:

| Provincial Documents Corresponding to Central Guideline #2:  国务院办公厅关于实施食品药品放心工程的通知 | | | | |
| --- | --- | --- | --- | --- |
| ID | Title of the document | Release Date | Straight Measure of  Content Coverage | Refined Content Coverage after Removing Formulaic Sentences |
| 1 | 北京市人民政府办公厅关于实施食品药品放心工程的通知 | 2003年8月 | 0.47520 | 0.46703 |
| 2 | 重庆市人民政府关于印发重庆市实施食品药品放心工程工作方案和进一步深入开展剧毒急性鼠药专项整治行动方案的通知 | 2003年8月 | 0.40035 | 0.40659 |
| 3 | 广东省人民政府办公厅转发国务院办公厅关于实施食品药品放心工程的通知 | 2003年8月 | 0.05396 | 0.07005 |
| 4 | 甘肃省人民政府办公厅批转省食品药品监管局关于甘肃省食品放心工程三年规划的通知 | 2005年3月 | 0.08790 | 0.14423 |
| 5 | 贵州省人民政府办公厅关于实施药品放心工程的通知 | 2003年8月 | 0.13751 | 0.17995 |
| 6 | 海南省人民政府办公厅关于印发海南省实施食品药品放心工程工作方案的通知 | 2003年8月 | 0.28895 | 0.24038 |
| 7 | 黑龙江省人民政府办公厅关于印发黑龙江省食品放心工程实施方案和黑龙江省药品放心工程实施方案的通知 | 2003年8月 | 0.30635 | 0.36538 |
| 8 | 河南省人民政府办公厅关于转发省食品药品安全委员会办公室2004年河南省食品药品放心工程实施方案的通知 | 2004年5月 | 0.20453 | 0.21841 |
| 9 | 湖南省人民政府办公厅关于印发《湖南省食品药品放心工程实施方案》的通知 | 2003年1月 | 0.19234 | 0.21978 |
| 10 | 江苏省食品药品放心工程实施方案 | 2003年9月 | 0.23499 | 0.27747 |
| 11 | 江西省人民政府办公厅关于印发江西省实施食品药品放心工程工作方案的通知 | 2003年8月 | 0.69104 | 0.78709 |
| 12 | 辽宁省人民政府办公厅关于印发2005年全省食品药品专项整治工作安排的通知 | 2005年5月 | 0.18190 | 0.21291 |
| 13 | 内蒙古自治区人民政府办公厅关于印发食品药品放心工程实施方案的通知 | 2003年8月 | 0.25239 | 0.28984 |
| 14 | 青海省人民政府办公厅关于实施食品药品放心工程的通知 | 2003年9月 | 0.34987 | 0.54670 |
| 15 | 山东省人民政府办公厅关于印发山东省食品药品放心工程实施方案的通知 | 2003年8月 | 0.11836 | 0.15659 |
| 16 | 上海市人民政府办公厅转发市整顿办关于本市实施药品放心工程的工作意见 | 2003年8月 | 0.12794 | 0.12637 |
| 17 | 陕西省人民政府办公厅关于印发实施食品药品放心工程工作方案的通知 | 2003年8月 | 0.56658 | 0.60440 |
| 18 | 山西省人民政府办公厅关于实施山西省食品药品放心工程的通知 | 2003年8月 | 0.28024 | 0.30769 |
| 19 | 天津市人民政府办公厅关于做好我市重点食品市场准入工作的通知 | 2003年12月 | 0.05570 | 0.08791 |
| 20 | 西藏自治区人民政府办公厅关于印发西藏自治区食品药品放心工程工作方案的通知 | 2003年9月 | 0.26371 | 0.30082 |
| 21 | 新疆维吾尔自治区人民政府办公厅关于实施食品药品放心工程的意见 | 2003年8月 | 0.50392 | 0.62363 |

Table C3:

| Provincial Documents Corresponding to Central Guideline #3:  国务院办公厅关于清理整顿各类开发区加强建设用地管理的通知 | | | | |
| --- | --- | --- | --- | --- |
| ID | Title of the document | Release Date | Straight Measure of  Content Coverage | Refined Content Coverage after Removing Formulaic Sentences |
| 1 | 安徽省人民政府办公厅转发国务院办公厅关于清理整顿各类开发区加强建设用地管理的通知 | 2003年8月 | 0.07521 | 0.14050 |
| 2 | 北京市人民政府关于公布撤销各类开发区名单的通知 | 2004年4月 | 0.02906 | 0.05785 |
| 3 | 重庆市人民政府办公厅转发国务院办公厅关于暂停审批各类开发区和清理整顿各类开发区加强建设用地管理的通知的通知 | 2003年8月 | 0.21880 | 0.29477 |
| 4 | 福建省人民政府办公厅转发国务院办公厅关于清理整顿各类开发区加强建设用地管理的通知 | 2003年9月 | 0.08034 | 0.08815 |
| 5 | 广东省人民政府办公厅转发国务院办公厅关于清理整顿各类开发区加强建设用地管理的通知 | 2003年9月 | 0.08205 | 0.15978 |
| 6 | 甘肃省人民政府办公厅关于清理整顿各类开发区加强建设用地管理的通知 | 2003年8月 | 0.13846 | 0.20661 |
| 7 | 广西壮族自治区人民政府办公厅关于清理整顿各类开发区加强建设用地管理的通知 | 2003年8月 | 0.53504 | 0.76033 |
| 8 | 海南省人民政府关于治理整顿土地市场的若干意见 | 2003年12月 | 0.16923 | 0.26171 |
| 9 | 河北省人民政府办公厅关于进一步治理整顿土地市场秩序的通知 | 2003年8月 | 0.27521 | 0.47934 |
| 10 | 黑龙江省人民政府办公厅印发关于进一步治理整顿土地市场秩序加强土地市场运营管理专项推进方案的通知 | 2003年9月 | 0.22222 | 0.26171 |
| 11 | 河南省人民政府办公厅关于进一步治理整顿土地市场秩序加强建设用地管理的通知 | 2003年8月 | 0.52991 | 0.64187 |
| 12 | 吉林市人民政府办公厅关于全面实行国有土地使用权招标拍卖挂牌出让的实施意见 | 2003年8月 | 0.12650 | 0.14876 |
| 13 | 江苏省政府办公厅转发国家发展和改革委员会等四部委关于清理整顿现有各类开发区的具体标准和政策界限通知的通知 | 2004年2月 | 0.19316 | 0.20937 |
| 14 | 江西省人民政府办公厅转发国务院办公厅关于清理整顿各类开发区加强建设用地管理的通知 | 2003年8月 | 0.08034 | 0.09642 |
| 15 | 宁夏回族自治区人民政府办公厅贯彻落实国务院办公厅《关于清理整顿各类开发区加强建设用地管理的通知》的通知 | 2003年8月 | 0.51966 | 0.73278 |
| 16 | 青海省人民政府办公厅转发省国土资源厅关于深入开展土地市场秩序治理整顿工作意见的通知 | 2003年8月 | 0.21538 | 0.24793 |
| 17 | 四川省人民政府关于进-步规范土地市场清理整顿各类开发区加强建设用地管理的通知 | 2003年8月 | 0.37778 | 0.53444 |
| 18 | 山东省人民政府办公厅关于贯彻国办发[2003]70号文件清理整顿各类开发区加强建设用地管理的通知 | 2003年8月 | 0.39316 | 0.46281 |
| 19 | 陕西省人民政府办公厅关于清理整顿各类开发区加强建设用地管理工作的安排意见 | 2003年8月 | 0.60513 | 0.69421 |
| 20 | 天津市人民政府关于进一步开展治理整顿土地市场秩序工作的通知 | 2003年8月 | 0.12991 | 0.11019 |
| 21 | 西藏自治区人民政府办公厅转发自治区国土资源厅关于进一步加强治理整顿土地市场秩序的若干意见的通知 | 2003年9月 | 0.09402 | 0.11570 |
| 22 | 新疆维吾尔自治区人民政府办公厅转发国务院办公厅关于清理整顿各类开发区加强建设用地管理通知的通知 | 2003年1月 | 0.26325 | 0.49587 |
| 23 | 云南省人民政府关于撤销玉溪市高仓工业区等53个开发区的通知 | 2004年4月 | 0.04103 | 0.09091 |
| 24 | 浙江省人民政府办公厅关于清理整顿各类开发区加强建设用地管理的通知 | 2003年9月 | 0.37607 | 0.33058 |

Table C4:

| Provincial Documents Corresponding to Central Guideline #4:  国务院办公厅关于进一步做好农业标准化工作的通知 | | | | |
| --- | --- | --- | --- | --- |
| ID | Title of the document | Release Date | Straight Measure of  Content Coverage | Refined Content Coverage after Removing Formulaic Sentences |
| 1 | 安徽省人民政府办公厅关于进—步加强农业标准化工作的通知 | 2004年9月 | 0.12409 | 0.13364 |
| 2 | 北京市人民政府办公厅关于进一步做好本市农业标准化工作的通知 | 2005年1月 | 0.29380 | 0.29672 |
| 3 | 重庆市人民政府办公厅关于大力推进农业标准化工作的通知 | 2004年7月 | 0.25730 | 0.28313 |
| 4 | 广东省人民政府办公厅转发国务院办公厅关于进一步做好农业标准化工作的通知 | 2004年2月 | 0.08850 | 0.09626 |
| 5 | 广西壮族自治区人民政府办公厅关于加快推进农业标准化工作的通知 | 2004年3月 | 0.45073 | 0.53001 |
| 6 | 海南省人民政府办公厅关于印发海南省农业标准化工作2007－2010年规划的通知 | 2007年12月 | 0.24818 | 0.25142 |
| 7 | 湖北省人民政府办公厅关于加强全省农业标准化工作的意见 | 2004年4月 | 0.14416 | 0.22990 |
| 8 | 江苏省政府办公厅关于进一步做好农业标准化工作的通知 | 2004年6月 | 0.21168 | 0.29672 |
| 9 | 江西省人民政府办公厅关于进一步做好全省农业标准化工作的通知 | 2005年5月 | 0.30018 | 0.40204 |
| 10 | 辽宁省人民政府办公厅转发省农委关于加快推进全省农业标准化工作实施意见的通知 | 2005年11月 | 0.25091 | 0.24009 |
| 11 | 青海省人民政府办公厅转发省质量技术监督局、省农牧厅关于加强全省农业标准化工作意见的通知 | 2004年7月 | 0.31569 | 0.32050 |
| 12 | 山东省人民政府关于大力推行农业标准化生产全面提升农产品质量安全水平的意见 | 2007年6月 | 0.19434 | 0.20385 |
| 13 | 上海市农业委员会关于进一步推进农业标准化工作的若干意见 | 2006年11月 | 0.28102 | 0.27293 |
| 14 | 陕西省人民政府办公厅关于进一步做好农业标准化工作的通知 | 2004年7月 | 0.23905 | 0.23556 |
| 15 | 新疆维吾尔自治区人民政府办公厅关于转发自治区质量技术监督局等部门《新疆维吾尔自治区农产品质量安全标准体系发展规划》的通知 | 2005年2月 | 0.21898 | 0.22424 |
| 16 | 云南省人民政府关于加快推进农业标准化工作的意见 | 2005年1月 | 0.26004 | 0.26048 |

Table C5:

| Provincial Documents Corresponding to Central Guideline #5:  国务院关于进一步加强安全生产工作的决定 | | | | |
| --- | --- | --- | --- | --- |
| ID | Title of the document | Release Date | Straight Measure of  Content Coverage | Refined Content Coverage after Removing Formulaic Sentences |
| 1 | 安徽省人民政府关于进一步加强安全生产工作的决定 | 2004年5月 | 0.22097 | 0.31734 |
| 2 | 北京市人民政府贯彻落实国务院关于进一步加强安全生产工作决定的若干意见 | 2004年7月 | 0.18824 | 0.32450 |
| 3 | 重庆市人民政府关于进一步加强安全生产工作的意见 | 2004年9月 | 0.29974 | 0.35673 |
| 4 | 福建省人民政府办公厅转发省煤矿安全生产专项工作领导小组办公室关于福建省2004年 | 2004年5月 | 0.08082 | 0.10817 |
| 5 | 广东省人民政府转发国务院关于进一步加强安全生产工作的决定的通知 | 2004年3月 | 0.03734 | 0.04298 |
| 6 | 甘肃省人民政府关于进一步加强安全生产工作的决定 | 2005年1月 | 0.16113 | 0.26218 |
| 7 | 广西壮族自治区人民政府关于贯彻落实国务院进一步加强安全生产工作决定的意见 | 2004年7月 | 0.32020 | 0.37106 |
| 8 | 贵州省人民政府关于贯彻国务院关于进一步加强安全生产工作的决定的实施意见 | 2004年5月 | 0.19540 | 0.26504 |
| 9 | 海南省人民政府关于进一步加强安全生产工作的决定 | 2004年11月 | 0.18210 | 0.26576 |
| 10 | 河北省人民政府办公厅关于印发《河北省奖励举报生产安全事故及事故隐患暂行办法》的通知 | 2004年3月 | 0.06496 | 0.09241 |
| 11 | 黑龙江省人民政府关于进一步加强安全生产工作的决定 | 2005年4月 | 0.18159 | 0.27794 |
| 12 | 河南省人民政府贯彻落实国务院关于进一步加强安全生产工作决定的实施意见 | 2004年5月 | 0.21330 | 0.32235 |
| 13 | 湖北省人民政府关于进一步加强安全生产工作的决定 | 2004年11月 | 0.20307 | 0.29656 |
| 14 | 湖南省人民政府关于进一步加强安全生产工作的决定 | 2004年2月 | 0.15550 | 0.33596 |
| 15 | 吉林省人民政府贯彻落实国务院关于进一步加强安全生产工作决定的实施意见 | 2004年3月 | 0.27161 | 0.43768 |
| 16 | 江苏省政府关于进一步加强安全生产工作的决定 | 2004年3月 | 0.19744 | 0.34312 |
| 17 | 江西省人民政府关于进一步加强安全生产工作的决定 | 2004年2月 | 0.38465 | 0.46991 |
| 18 | 辽宁省市级人民政府安全生产工作目标管理考核办法 | 2004年7月 | 0.04041 | 0.04656 |
| 19 | 内蒙古自治区人民政府关于进一步加强安全生产工作的决定 | 2004年2月 | 0.17647 | 0.24355 |
| 20 | 宁夏回族自治区人民政府关于进一步加强全区安全生产工作的决定 | 2005年6月 | 0.35090 | 0.40258 |
| 21 | 青海省人民政府关于进一步加强安全生产工作的决定 | 2004年4月 | 0.39130 | 0.41046 |
| 22 | 四川省人民政府关于进一步加强安全生产工作的决定 | 2004年10月 | 0.28645 | 0.29083 |
| 23 | 山东省人民政府关于进一步加强安全生产工作的决定 | 2004年2月 | 0.27212 | 0.37607 |
| 24 | 上海市人民政府关于贯彻国务院《决定》进一步做好本市安全生产工作的通知 | 2004年3月 | 0.11662 | 0.17479 |
| 25 | 陕西省人民政府关于进一步加强安全生产工作的决定 | 2004年5月 | 0.39182 | 0.48997 |
| 26 | 山西省人民政府关于进一步加强安全生产工作的决定 | 2004年2月 | 0.46292 | 0.58954 |
| 27 | 天津市安全生产管理规定 | 2004年3月 | 0.11918 | 0.16547 |
| 28 | 西藏自治区人民政府贯彻国务院关于进一步加强安全生产工作决定的实施意见 | 2004年5月 | 0.26547 | 0.27937 |
| 29 | 新疆维吾尔自治区人民政府办公厅关于印发深入开展人员密集场所消防安全专项治理实施方案的通知 | 2004年5月 | 0.06752 | 0.10100 |
| 30 | 云南省人民政府关于进一步加强安全生产工作的决定 | 2004年7月 | 0.18159 | 0.27579 |
| 31 | 浙江省人民政府关于切实加强安全生产工作的决定 | 2004年8月 | 0.36522 | 0.48424 |

Table C6:

| Provincial Documents Corresponding to Central Guideline #6:  国务院关于切实加强艾滋病防治工作的通知 | | | | |
| --- | --- | --- | --- | --- |
| ID | Title of the document | Release Date | Straight Measure of  Content Coverage | Refined Content Coverage after Removing Formulaic Sentences |
| 1 | 安徽省人民政府贯彻国务院关于切实加强艾滋病防治工作通知的实施意见 | 2004年8月 | 0.42219 | 0.45965 |
| 2 | 重庆市人民政府关于切实加强艾滋病防治工作的通知 | 2004年5月 | 0.36798 | 0.47886 |
| 3 | 福建省人民政府关于切实加强艾滋病防治工作的通知 | 2004年8月 | 0.48151 | 0.76018 |
| 4 | 广东省人民政府转发国务院关于切实加强艾滋病防治工作的通知 | 2004年5月 | 0.06250 | 0.05919 |
| 5 | 贵州省人民政府办公厅转发省卫生厅关于我省艾滋病防治工作情况和下一步工作意见的通知 | 2005年8月 | 0.17793 | 0.18909 |
| 6 | 海南省人民政府关于切实加强艾滋病防治工作的通知 | 2004年7月 | 0.24681 | 0.30515 |
| 7 | 河北省人民政府关于切实加强艾滋病防治工作的通知 | 2004年11月 | 0.25510 | 0.33820 |
| 8 | 湖北省人民政府关于加强艾滋病防治工作的意见 | 2004年4月 | 0.18112 | 0.21368 |
| 9 | 湖南省人民政府关于切实加强艾滋病防治工作的通知 | 2004年8月 | 0.33163 | 0.38893 |
| 10 | 吉林省人民政府关于切实加强艾滋病防治工作的通知 | 2004年6月 | 0.21237 | 0.25211 |
| 11 | 江苏省政府关于切实加强艾滋病防治工作的意见 | 2004年7月 | 0.25510 | 0.29362 |
| 12 | 江西省人民政府关于加强艾滋病防治工作的意见 | 2004年8月 | 0.44452 | 0.52498 |
| 13 | 内蒙古自治区人民政府转发国务院关于切实加强艾滋病防治工作的通知 | 2004年5月 | 0.05357 | 0.04996 |
| 14 | 宁夏回族自治区人民政府关于加强艾滋病防治工作的意见 | 2004年7月 | 0.18495 | 0.18755 |
| 15 | 青海省人民政府办公厅转发省卫生厅关于加强艾滋病防治工作实施意见的通知 | 2004年5月 | 0.36224 | 0.51115 |
| 16 | 山东省人民政府关于贯彻国发[2004]7号文件切实加强艾滋病防治工作的意见 | 2004年5月 | 0.50638 | 0.54573 |
| 17 | 上海市人民政府关于进一步加强本市艾滋病防治工作的通知 | 2004年8月 | 0.26276 | 0.30746 |
| 18 | 陕西省人民政府关于加强艾滋病防治工作的意见 | 2004年6月 | 0.14987 | 0.17141 |
| 19 | 山西省人民政府关于贯彻落实国务院关于切实加强艾滋病防治工作的通知的实施意见 | 2004年6月 | 0.32589 | 0.38125 |
| 20 | 西藏自治区人民政府办公厅转发自治区卫生厅等部门关于进一步加强艾滋病防治工作意见的通知 | 2004年4月 | 0.09694 | 0.11606 |
| 21 | 新疆维吾尔自治区人民政府关于贯彻国务院关于切实加强艾滋病防治工作通知的实施意见 | 2004年9月 | 0.14860 | 0.19754 |
| 22 | 浙江省人民政府关于进一步加强艾滋病防治工作的意见 | 2005年8月 | 0.26786 | 0.28055 |

Table C7:

| Provincial Documents Corresponding to Central Guideline #7:  国务院办公厅关于加强生物物种资源保护和管理的通知 | | | | |
| --- | --- | --- | --- | --- |
| ID | Title of the document | Release Date | Straight Measure of  Content Coverage | Refined Content Coverage after Removing Formulaic Sentences |
| 1 | 安徽省人民政府办公厅转发国务院办公厅关于加强生物物种资源保护和管理的通知 | 2004年7月 | 0.13206 | 0.15405 |
| 2 | 重庆市人民政府办公厅关于加强生物物种资源保护和管理的通知 | 2005年1月 | 0.21299 | 0.29189 |
| 3 | 福建省人民政府办公厅关于加强生物物种资源保护和管理的通知 | 2005年12月 | 0.17678 | 0.25946 |
| 4 | 广东省人民政府办公厅转发国务院办公厅关于加强生物物种资源保护和管理的通知 | 2004年5月 | 0.07881 | 0.07703 |
| 5 | 湖南省人民政府办公厅关于加强农业野生植物保护工作的通知 | 2005年4月 | 0.06496 | 0.09324 |
| 6 | 江苏省政府办公厅关于加强生物物种资源保护和管理工作的通知 | 2004年9月 | 0.22258 | 0.30405 |
| 7 | 江西省人民政府办公厅关于成立江西省生物物种资源保护与利用规划编制工作领导小组的通知 | 2008年12月 | 0.01491 | 0.01486 |
| 8 | 青海省人民政府办公厅关于加强我省生物物种资源保护和管理的意见 | 2004年8月 | 0.29286 | 0.46486 |
| 9 | 云南省人民政府办公厅转发国务院办公厅关于加强生物物种资源保护和管理文件的通知 | 2004年12月 | 0.13525 | 0.15811 |
| 10 | 浙江省人民政府办公厅关于加强生物物种资源保护和管理的通知 | 2004年1月 | 0.11502 | 0.14865 |

Table C8:

| Provincial Documents Corresponding to Central Guideline #8:  国务院办公厅关于开展资源节约活动的通知 | | | | |
| --- | --- | --- | --- | --- |
| ID | Title of the document | Release Date | Straight Measure of  Content Coverage | Refined Content Coverage after Removing Formulaic Sentences |
| 1 | 安徽省人民政府办公厅转发国务院办公厅关于开展资源节约活动的通知 | 2004年5月 | 0.05354 | 0.10161 |
| 2 | 北京市人民政府办公厅转发市发展改革委关于本市开展资源节约活动实施方案的通知 | 2004年7月 | 0.29213 | 0.32294 |
| 3 | 重庆市人民政府关于开展资源节约活动的实施意见 | 2004年6月 | 0.20000 | 0.28773 |
| 4 | 广东省人民政府办公厅转发国务院办公厅关于开展资源节约活动的通知 | 2004年6月 | 0.02205 | 0.02213 |
| 5 | 甘肃省人民政府办公厅批转省经委关于开展资源节约活动实施意见的通知 | 2004年12月 | 0.20236 | 0.28571 |
| 6 | 广西壮族自治区人民政府办公厅关于转发自治区经委开展资源节约活动联席会议制度的通知 | 2004年9月 | 0.06142 | 0.10664 |
| 7 | 河北省人民政府办公厅关于开展节水型社会建设年活动的通知 | 2006年4月 | 0.07638 | 0.09557 |
| 8 | 河南省人民政府办公厅关于开展资源节约活动加快建设资源节约型社会的通知 | 2004年6月 | 0.22283 | 0.24648 |
| 9 | 吉林省人民政府办公厅关于印发吉林省开展资源节约活动工作方案的通知 | 2004年9月 | 0.21811 | 0.22535 |
| 10 | 江苏省政府办公厅关于印发开展资源节约活动实施方案的通知 | 2004年12月 | 0.13150 | 0.18612 |
| 11 | 江西省人民政府办公厅关于开展资源节约活动的通知 | 2004年9月 | 0.04252 | 0.03320 |
| 12 | 辽宁省人民政府办公厅转发省经委关于开展资源节约活动实施意见的通知 | 2004年5月 | 0.22835 | 0.26861 |
| 13 | 青海省人民政府办公厅转发省经委关于开展资源节约活动意见的通知 | 2004年5月 | 0.17638 | 0.24748 |
| 14 | 四川省人民政府办公厅关于在全省深入开展资源节约活动的实施意见 | 2005年10月 | 0.52913 | 0.52817 |
| 15 | 山东省人民政府办公厅关于贯彻国办发[2004]30号文件开展资源节约活动的通知 | 2004年8月 | 0.31575 | 0.46076 |
| 16 | 陕西省人民政府办公厅关于深入开展资源节约活动的实施意见 | 2004年11月 | 0.25984 | 0.35010 |
| 17 | 山西省人民政府办公厅关于在全省深入开展资源节约活动的实施意见 | 2004年6月 | 0.20630 | 0.28571 |
| 18 | 天津市人民政府批转市经委拟定的天津市深入开展资源节约活动实施方案的通知 | 2004年8月 | 0.23543 | 0.24547 |
| 19 | 新疆维吾尔自治区人民政府关于新疆维吾尔自治区开展资源节约活动的实施意见 | 2004年8月 | 0.41496 | 0.64688 |
| 20 | 云南省人民政府办公厅转发国务院办公厅关于开展资源节约活动文件的通知 | 2004年9月 | 0.24646 | 0.25352 |
| 21 | 浙江省人民政府办公厅关于开展资源节约活动的意见 | 2004年7月 | 0.10709 | 0.15895 |

Table C9:

| Provincial Documents Corresponding to Central Guideline #9:  国务院办公厅关于进一步加强森林防火工作的通知 | | | | |
| --- | --- | --- | --- | --- |
| ID | Title of the document | Release Date | Straight Measure of  Content Coverage | Refined Content Coverage after Removing Formulaic Sentences |
| 1 | 福建省人民政府办公厅转发国务院办公厅关于进一步加强森林防火工作的通知 | 2004年5月 | 0.03898 | 0.03664 |
| 2 | 甘肃省人民政府办公厅关于切实加强全省森林防火工作的通知 | 2004年11月 | 0.11535 | 0.15911 |
| 3 | 广西壮族自治区森林防火实施办法 | 2004年6月 | 0.18536 | 0.18901 |
| 4 | 黑龙江省人民政府关于进一步做好森林防火工作的意见 | 2005年9月 | 0.13604 | 0.18226 |
| 5 | 湖南省人民政府办公厅关于进一步加强森林防火工作的通知 | 2005年1月 | 0.21798 | 0.26037 |
| 6 | 江苏省政府办公厅关于加强森林防火工作的通知 | 2004年11月 | 0.29674 | 0.41948 |
| 7 | 江西省人民政府办公厅关于进一步加强全省森林防火工作的通知 | 2005年5月 | 0.29833 | 0.42719 |
| 8 | 辽宁省人民政府办公厅关于进一步做好森林防火工作的通知 | 2004年9月 | 0.10581 | 0.15815 |
| 9 | 宁夏回族自治区人民政府办公厅关于进一步加强森林防火工作的通知 | 2006年8月 | 0.29833 | 0.42237 |
| 10 | 四川省人民政府办公厅关于进一步加强森林防火工作的通知 | 2004年7月 | 0.52824 | 0.59209 |
| 11 | 陕西省人民政府办公厅关于进一步加强森林防火工作的通知 | 2004年12月 | 0.51790 | 0.62777 |
| 12 | 天津市人民政府办公厅转发市林业局、市气象局关于切实做好森林防火气象服务工作意见的通知 | 2006年4月 | 0.08115 | 0.07232 |
| 13 | 新疆维吾尔自治区人民政府办公厅转发自治区林业局关于贯彻实施国务院办公厅关于进一步加强森林防火工作通知的意见的通知 | 2005年7月 | 0.33413 | 0.34523 |
| 14 | 云南省人民政府二00六年森林防火命令 | 2006年4月 | 0.07399 | 0.07522 |

Table C10:

| Provincial Documents Corresponding to Central Guideline #10:  国务院办公厅关于推进水价改革促进节约用水保护水资源的通知 | | | | |
| --- | --- | --- | --- | --- |
| ID | Title of the document | Release Date | Straight Measure of  Content Coverage | Refined Content Coverage after Removing Formulaic Sentences |
| 1 | 北京市人民政府令 | 2005年3月 | 0.11871 | 0.12399 |
| 2 | 重庆市人民政府关于推进水价改革促进节约用水保护水资源的实施意见 | 2005年12月 | 0.29640 | 0.31804 |
| 3 | 福建省人民政府办公厅转发省物价局关于推进水价综合改革促进节约用水保护水资源实施意见的通知 | 2005年8月 | 0.21511 | 0.25282 |
| 4 | 广东省政府办公厅转发国务院办公厅关于推进水价改革促进节约用水保护水资源的通知 | 2004年6月 | 0.03309 | 0.02738 |
| 5 | 甘肃省人民政府办公厅批转省建设厅等部门关于加强自备水源用户城市污水处理费征收工作意见的通知 | 2005年11月 | 0.02230 | 0.02657 |
| 6 | 贵州省人民政府关于加快推进节约用水和水价改革促进水资源可持续利用的意见 | 2006年11月 | 0.29209 | 0.30515 |
| 7 | 海南省人民政府关于推进水价改革促进节约用水保护水资源的实施意见 | 2006年11月 | 0.43957 | 0.47343 |
| 8 | 黑龙江省人民政府办公厅转发国务院办公厅关于推进水价改革促进节约用水保护水资源通知的通知 | 2004年8月 | 0.03813 | 0.03704 |
| 9 | 河南省节约用水管理条例 | 2004年5月 | 0.10791 | 0.12158 |
| 10 | 湖北省人民政府办公厅关于推进水价改革促进节约用水保护水资源的通知 | 2OO5年9月 | 0.41439 | 0.49275 |
| 11 | 吉林省人民政府办公厅转发国务院办公厅关于推进水价改革促进节约用水保护水资源的通知 | 2005年2月 | 0.06403 | 0.06763 |
| 12 | 江苏省政府办公厅关于转发省物价局江苏省“十一五”水价改革意见的通知 | 2006年12月 | 0.13237 | 0.15781 |
| 13 | 江西省人民政府办公厅关于推进水价改革促进节约用水保护水资源的通知 | 2004年8月 | 0.48561 | 0.60709 |
| 14 | 青海省人民政府办公厅转发省发展改革委、省水利厅关于贯彻落实国务院办公厅推进水价改革 | 2004年7月 | 0.11511 | 0.13607 |
| 15 | 四川省人民政府办公厅印发省物价局等部门关于《四川省城市生活污水处理费收费管理办法》的通知 | 2005年6月 | 0.05468 | 0.06441 |
| 16 | 上海市节约用水管理办法 | 2004年6月 | 0.05899 | 0.08293 |
| 17 | 山西省人民政府关于调整城市污水处理费标准等有关问题的通知 | 2004年12月 | 0.05540 | 0.06039 |
| 18 | 西藏自治区人民政府办公厅转发自治区发展改革委、财政厅、建设厅、水利厅、环境保护局关于推进我区水价改革促进节约用水保护水资源实施意见的通知 | 2005年6月 | 0.11871 | 0.14815 |
| 19 | 云南省人民政府办公厅转发省发改委关于深化水价改革促进节约用水保护水资源实施意见的通知 | 2005年9月 | 0.35612 | 0.38084 |
| 20 | 浙江省节约用水办法 | 2007年8月 | 0.13453 | 0.13929 |

Table C11:

| Provincial Documents Corresponding to Central Guideline #11:  国务院关于做好省级以下国土资源管理体制改革有关问题的通知 | | | | |
| --- | --- | --- | --- | --- |
| ID | Title of the document | Release Date | Straight Measure of  Content Coverage | Refined Content Coverage after Removing Formulaic Sentences |
| 1 | 安徽省人民政府关于做好省以下国土资源管理体制改革的通知 | 2004年12月 | 0.42105 | 0.54545 |
| 2 | 北京市人民政府办公厅关于组建北京市国土资源局等有关事宜的通知 | 2004年6月 | 0.05639 | 0.04935 |
| 3 | 重庆市人民政府关于国土资源管理体制改革的实施意见 | 2005年1月 | 0.38722 | 0.38701 |
| 4 | 福建省人民政府关于做好国土资源管理体制改革的实施意见 | 2004年12月 | 0.35902 | 0.38961 |
| 5 | 广东省人民政府印发广东省国土资源管理体制改革实施意见的通知 | 2004年12月 | 0.39474 | 0.54805 |
| 6 | 甘肃省人民政府关于省以下国土资源管理体制改革的实施意见 | 2004年12月 | 0.41541 | 0.47273 |
| 7 | 广西壮族自治区人民政府关于印发自治区级以下国土资源管理体制改革实施方案的通知 | 2004年1月 | 0.64098 | 0.77143 |
| 8 | 贵州省人民政府关于省以下国土资源管理体制改革的实施意见 | 2004年11月 | 0.31391 | 0.33506 |
| 9 | 海南省人民政府关于印发海南省国土环境资源管理体制改革实施意见的通知 | 2005年1月 | 0.41353 | 0.48052 |
| 10 | 河南省国土资源管理体制改革实施方案 | 2004年11月 | 0.34398 | 0.33506 |
| 11 | 湖北省人民政府关于做好全省国土资源管理体制改革工作的通知 | 2004年11月 | 0.34962 | 0.38442 |
| 12 | 湖南省人民政府关于国土资源管理体制改革的实施意见 | 2004年8月 | 0.30639 | 0.34545 |
| 13 | 吉林省人民政府关于印发国土资源管理体制改革实施意见的通知 | 2004年11月 | 0.29699 | 0.36623 |
| 14 | 江苏省政府关于省级以下国土资源管理体制改革的实施意见 | 2004年10月 | 0.41353 | 0.43636 |
| 15 | 江西省人民政府关于省以下国土资源管理体制改革的实施意见 | 2004年12月 | 0.41165 | 0.46234 |
| 16 | 辽宁省人民政府关于印发全省国土资源管理体制改革方案的通知 | 2004年1月 | 0.40789 | 0.52208 |
| 17 | 内蒙古自治区人民政府关于国土资源管理体制改革的实施意见 | 2004年12月 | 0.43797 | 0.47532 |
| 18 | 青海省人民政府办公厅关于印发青海省国土资源管理体制改革方案的通知 | 2004年11月 | 0.56203 | 0.53766 |
| 19 | 四川省人民政府关于四川省国土资源管理体制改革的实施意见 | 2004年12月 | 0.51880 | 0.59221 |
| 20 | 山东省人民政府关于印发山东省国土资源管理体制改革实施意见的通知 | 2004年11月 | 0.37030 | 0.42338 |
| 21 | 陕西省人民政府关于国土资源管理体制改革的实施意见 | 2004年12月 | 0.36466 | 0.38701 |
| 22 | 山西省人民政府关于国土资源管理体制改革的实施意见 | 2004年11月 | 0.35902 | 0.41558 |
| 23 | 西藏自治区人民政府办公厅关于印发全区国土资源管理体制改革意见的通知 | 2005年5月 | 0.10338 | 0.26753 |
| 24 | 新疆维吾尔自治区人民政府办公厅关于印发新疆维吾尔自治区国土资源管理体制改革实施意见的通知 | 2004年11月 | 0.39850 | 0.44675 |
| 25 | 云南省人民政府转发国务院关于做好省级以下国土资源管理体制改革文件的通知 | 2004年6月 | 0.10714 | 0.15065 |
| 26 | 浙江省人民政府关于改革省以下国土资源管理体制的实施意见 | 2004年9月 | 0.33835 | 0.38701 |

Table C12:

| Provincial Documents Corresponding to Central Guideline #12:  国务院关于进一步加强血吸虫病防治工作的通知 | | | | |
| --- | --- | --- | --- | --- |
| ID | Title of the document | Release Date | Straight Measure of  Content Coverage | Refined Content Coverage after Removing Formulaic Sentences |
| 1 | 安徽省人民政府贯彻国务院关于进一步加强血吸虫病防治工作通知的实施意见 | 2004年7月 | 0.60518 | 0.74849 |
| 2 | 福建省人民政府转发国务院关于进一步加强血吸虫病防治工作的通知 | 2004年7月 | 0.08626 | 0.10372 |
| 3 | 广东省人民政府办公厅转发省卫生厅《广东省血吸虫病监测巩固工作中长期实施方案》的通知 | 2005年5月 | 0.13139 | 0.15730 |
| 4 | 广西壮族自治区人民政府办公厅关于转发自治区卫生厅等部门广西壮族自治区预防控制 | 2004年11月 | 0.12541 | 0.14952 |
| 5 | 江苏省政府关于进一步加强血吸虫病防治工作的意见 | 2004年7月 | 0.20305 | 0.26707 |
| 6 | 四川省人民政府关于进一步加强血吸虫病防治工作的意见 | 2004年8月 | 0.36563 | 0.56266 |
| 7 | 上海市人民政府办公厅关于转发市爱卫会等七部门制订的《上海市预防控制血吸虫病中长期规划》的通知 | 2004年12月 | 0.11944 | 0.15644 |
| 8 | 云南省人民政府办公厅转发省卫生厅等部门云南省预防控制血吸虫病中长期规划纲要的通知 | 2005年4月 | 0.20902 | 0.24719 |

Table C13:

| Provincial Documents Corresponding to Central Guideline #13:  国务院办公厅关于加强湿地保护管理的通知 | | | | |
| --- | --- | --- | --- | --- |
| ID | Title of the document | Release Date | Straight Measure of  Content Coverage | Refined Content Coverage after Removing Formulaic Sentences |
| 1 | 安徽省人民政府办公厅转发国务院办公厅关于加强湿地保护管理的通知 | 2004年9月 | 0.05626 | 0.06284 |
| 2 | 北京市人民政府办公厅关于加强本市湿地保护管理工作的通知 | 2005年2月 | 0.30802 | 0.35907 |
| 3 | 重庆市人民政府办公厅关于加强湿地保护管理的通知 | 2004年1月 | 0.24191 | 0.34470 |
| 4 | 福建省人民政府办公厅关于加强湿地保护管理的通知 | 2005年4月 | 0.35021 | 0.42549 |
| 5 | 广东省人民政府办公厅转发国务院办公厅关于加强湿地保护管理的通知 | 2004年8月 | 0.07876 | 0.10413 |
| 6 | 河南省人民政府办公厅关于加强湿地保护管理的通知 | 2004年9月 | 0.36146 | 0.48474 |
| 7 | 湖北省人民政府办公厅关于加强湿地保护管理的通知 | 2004年11月 | 0.23488 | 0.46499 |
| 8 | 湖南省人民政府办公厅关于加强湿地保护管理工作的通知 | 2004年8月 | 0.10127 | 0.12567 |
| 9 | 吉林省人民政府办公厅关于切实加强湿地保护管理的通知 | 2004年1月 | 0.23207 | 0.40575 |
| 10 | 江苏省人民政府办公厅关于加强湿地保护管理的通知 | 2004年12月 | 0.52180 | 0.70377 |
| 11 | 江西省人民政府办公厅关于加强湿地保护管理的通知 | 2006年1月 | 0.32349 | 0.42011 |
| 12 | 辽宁省湿地保护条例 | 2007年7月 | 0.21097 | 0.23878 |
| 13 | 内蒙古自治区湿地保护条例 | 2007年5月 | 0.15752 | 0.17056 |
| 14 | 宁夏回族自治区湿地保护条例 | 2008年9月 | 0.21800 | 0.23698 |
| 15 | 青海省人民政府办公厅关于加强湿地保护管理的通知 | 2005年7月 | 0.36709 | 0.42190 |
| 16 | 四川省人民政府办公厅关于加强湿地保护管理的通知 | 2005年2月 | 0.47539 | 0.64991 |
| 17 | 陕西省人民政府办公厅关于加强湿地保护管理的通知 | 2004年10月 | 0.50633 | 0.47397 |
| 18 | 山西省人民政府办公厅关于加强湿地保护管理工作的通知 | 2005年9月 | 0.48383 | 0.52783 |
| 19 | 天津市人民政府办公厅关于加强我市湿地保护管理的通知 | 2004年12月 | 0.18003 | 0.22621 |
| 20 | 西藏自治区人民政府办公厅关于加强我区湿地保护管理的通知 | 2004年9月 | 0.33896 | 0.35727 |
| 21 | 云南省人民政府办公厅转发国务院办公厅关于加强湿地保护管理文件的通知 | 2004年1月 | 0.13783 | 0.19390 |
| 22 | 浙江省人民政府办公厅关于加强湿地保护管理工作的通知 | 2005年5月 | 0.21519 | 0.28905 |

Table C14:

| Provincial Documents Corresponding to Central Guideline #14:  国务院办公厅关于加强中央企业安全生产工作的通知 | | | | |
| --- | --- | --- | --- | --- |
| ID | Title of the document | Release Date | Straight Measure of  Content Coverage | Refined Content Coverage after Removing Formulaic Sentences |
| 1 | 安徽省人民政府办公厅关于加强中央在皖和省属企业安全生产工作的通知 | 2004年9月 | 0.26107 | 0.49196 |
| 2 | 北京市人民政府办公厅关于加强市属企业和中央在京企业安全生产工作的通知 | 2005年2月 | 0.34590 | 0.50000 |
| 3 | 重庆市人民政府办公厅关于加强中央在渝企业安全生产工作的通知 | 2004年9月 | 0.62865 | 0.80868 |
| 4 | 广东省人民政府办公厅印发广东省属企业及中央企业驻粤分支机构安全生产监管办法的通知 | 2005年1月 | 0.38831 | 0.50322 |
| 5 | 贵州省人民政府办公厅关于加强中央在黔及省属企业安全生产工作的通知 | 2005年1月 | 0.54571 | 0.77653 |
| 6 | 河南省人民政府办公厅关于认真贯彻国办发[2004]52号文件精神切实加强中央驻豫企业和省属企业安全生产工作的通知 | 2004年9月 | 0.09142 | 0.17846 |
| 7 | 湖北省人民政府办公厅关于加强中央在鄂企业和省属企业安全生产工作的通知 | 2005年12月 | 0.31197 | 0.62379 |
| 8 | 湖南省人民政府办公厅关于加强中央在湘和省属企业安全生产工作的通知 | 2005年12月 | 0.34684 | 0.53698 |
| 9 | 吉林省人民政府办公厅关于加强中央驻吉企业和省属企业安全生产工作的通知 | 2004年11月 | 0.59095 | 0.74920 |
| 10 | 江西省人民政府办公厅转发国务院办公厅关于加强中央企业安全生产工作的通知 | 2004年8月 | 0.06315 | 0.11093 |
| 11 | 辽宁省人民政府办公厅关于加强中央驻辽企业和省属企业安全生产工作的通知 | 2005年6月 | 0.51084 | 0.60129 |
| 12 | 青海省人民政府办公厅关于加强省属企业和中央驻青企业安全生产工作的通知 | 2004年8月 | 0.56079 | 0.87460 |
| 13 | 四川省人民政府办公厅关于加强中央在川企业和省属企业安全生产工作的通知 | 2004年10月 | 0.30160 | 0.36495 |
| 14 | 山东省人民政府办公厅关于贯彻国办发[2004]52号文件加强中央驻鲁企业和省管企业安全生产工作的通知 | 2004年1月 | 0.69934 | 0.86334 |
| 15 | 上海市人民政府办公厅关于做好中央在沪企业安全生产监管工作的通知 | 2004年1月 | 0.09142 | 0.16399 |
| 16 | 陕西省人民政府办公厅关于加强中央在陕企业安全生产工作的通知 | 2004年9月 | 0.25542 | 0.53537 |
| 17 | 山西省人民政府办公厅关于加强驻晋中央企业安全生产工作的通知 | 2004年9月 | 0.25919 | 0.32637 |
| 18 | 西藏自治区人民政府办公厅关于加强区直、中直企业安全生产工作的通知 | 2006年1月 | 0.70971 | 0.80707 |
| 19 | 云南省人民政府办公厅转发国务院办公厅关于加强中央企业安全生产工作文件的通知 | 2004年9月 | 0.11404 | 0.19453 |
| 20 | 浙江省人民政府办公厅转发省安全监管局关于切实加强中央在浙和省属企业安全生产工作意见的通知 | 2005年4月 | 0.52215 | 0.77492 |

Table C15:

| Provincial Documents Corresponding to Central Guideline #15:  国务院关于进一步加强食品安全工作的决定 | | | | |
| --- | --- | --- | --- | --- |
| ID | Title of the document | Release Date | Straight Measure of  Content Coverage | Refined Content Coverage after Removing Formulaic Sentences |
| 1 | 安徽省人民政府关于进一步加强食品安全工作的决定 | 2004年11月 | 0.48143 | 0.57438 |
| 2 | 重庆市人民政府办公厅关于印发全市食品生产加工业质量安全整顿工作方案的通知 | 2005年8月 | 0.12248 | 0.15993 |
| 3 | 福建省人民政府关于贯彻国务院进一步加强食品安全工作决定的通知 | 2005年11月 | 0.13420 | 0.22528 |
| 4 | 广东省人民政府转发国务院关于进一步加强食品安全工作的决定的通知 | 2004年1月 | 0.02280 | 0.02494 |
| 5 | 甘肃省人民政府关于进一步加强食品安全工作的意见 | 2004年11月 | 0.44560 | 0.54600 |
| 6 | 广西壮族自治区人民政府关于贯彻国务院进一步加强食品安全工作决定的意见 | 2004年11月 | 0.61694 | 0.72485 |
| 7 | 贵州省人民政府办公厅关于认真贯彻落实国务院进一步加强食品安全工作的决定切实抓好我省食品安全工作的通知 | 2004年11月 | 0.17199 | 0.27687 |
| 8 | 海南省人民政府办公厅印发《关于贯彻<国务院关于进一步加强食品安全工作的决定>的实施方案》的通知 | 2004年11月 | 0.36678 | 0.43594 |
| 9 | 河北省人民政府关于印发2005年全省整顿和规范市场经济秩序工作要点和专项整治工作实施方案的通知 | 2005年4月 | 0.19023 | 0.19003 |
| 10 | 河南省人民政府贯彻国务院关于进一步加强食品安全工作决定的意见 | 2005年3月 | 0.50228 | 0.64230 |
| 11 | 湖北省人民政府关于切实加强食品安全工作的意见 | 2004年12月 | 0.26189 | 0.35598 |
| 12 | 湖南省人民政府关于进一步加强食品安全工作的实施意见 | 2004年12月 | 0.14072 | 0.25623 |
| 13 | 吉林省人民政府贯彻落实国务院关于进一步加强食品安全工作决定的实施意见 | 2004年12月 | 0.57850 | 0.72829 |
| 14 | 江苏省人民政府关于进一步加强食品安全工作的意见 | 2005年1月 | 0.24104 | 0.34996 |
| 15 | 江西省人民政府关于进一步加强食品安全工作的决定 | 2004年11月 | 0.46971 | 0.62253 |
| 16 | 辽宁省人民政府关于切实加强食品安全工作的意见 | 2005年2月 | 0.48664 | 0.58899 |
| 17 | 内蒙古自治区人民政府办公厅关于印发食品安全重大事故应急预案的通知 | 2005年12月 | 0.13420 | 0.12554 |
| 18 | 宁夏回族自治区人民政府关于进一步加强食品安全工作的意见 | 2004年12月 | 0.59414 | 0.67068 |
| 19 | 青海省人民政府办公厅转发省食品药品安全协调委员会关于进一步加强我省食品安全工作意见的通知 | 2004年11月 | 0.41107 | 0.51935 |
| 20 | 四川省人民政府关于切实加强食品安全工作的决定 | 2004年12月 | 0.26124 | 0.37575 |
| 21 | 山东省人民政府关于贯彻国发[2004]23号文件进一步加强食品安全工作的意见 | 2004年12月 | 0.42150 | 0.45658 |
| 22 | 上海市人民政府关于调整本市食品安全有关监管部门职能的决定 | 2004年12月 | 0.01889 | 0.02322 |
| 23 | 陕西省人民政府关于贯彻落实国务院进一步加强食品安全工作决定的实施意见 | 2005年1月 | 0.30945 | 0.31986 |
| 24 | 山西省人民政府办公厅关于加强食品安全工作的意见 | 2007年2月 | 0.22866 | 0.25881 |
| 25 | 天津市人民政府办公厅转发市食品安全委员会办公室关于2005年我市食品安全专项整治工作安排意见的通知 | 2005年6月 | 0.19739 | 0.21840 |
| 26 | 西藏自治区人民政府关于切实加强食品安全工作的意见 | 2005年1月 | 0.45212 | 0.51075 |
| 27 | 新疆维吾尔自治区人民政府办公厅贯彻落实国务院关于进一步加强食品安全工作决定的意见 | 2005年1月 | 0.38632 | 0.56148 |
| 28 | 云南省人民政府办公厅转发《云南省人民政府法制办公室关于加强我省食品卫生安全执法和监督工作的意见》的通知 | 2005年3月 | 0.13811 | 0.14961 |
| 29 | 浙江省人民政府关于切实加强食品安全工作的实施意见 | 2004年12月 | 0.47687 | 0.58727 |

Table C16:

| Provincial Documents Corresponding to Central Guideline #16:  国务院关于深化改革严格土地管理的决定 | | | | |
| --- | --- | --- | --- | --- |
| ID | Title of the document | Release Date | Straight Measure of  Content Coverage | Refined Content Coverage after Removing Formulaic Sentences |
| 1 | 安徽省人民政府关于深化改革严格土地管理有关问题的通知 | 2005年4月 | 0.09199 | 0.11459 |
| 2 | 北京市人民政府转发国务院关于深化改革严格土地管理决定的通知京政发[2004]31号 | 2004年10月 | 0.00796 | 0.00490 |
| 3 | 重庆市人民政府转发国务院关于深化改革严格土地管理的决定的通知 | 2004年11月 | 0.01725 | 0.01469 |
| 4 | 福建省人民政府办公厅转发省国土资源厅等四部门关于促进工业项目集约合理用地若干意见的通知 | 2005年2月 | 0.02875 | 0.04358 |
| 5 | 广东省人民政府转发国务院关于深化改革严格土地管理的决定的通知 | 2004年11月 | 0.04954 | 0.05436 |
| 6 | 甘肃省人民政府关于深化改革严格土地管理的意见 | 2005年7月 | 0.31712 | 0.33203 |
| 7 | 广西壮族自治区人民政府转发国务院关于深化改革严格土地管理决定的通知 | 2004年11月 | 0.02786 | 0.03330 |
| 8 | 贵州省人民政府关于深化改革严格土地管理的实施意见 | 2005年6月 | 0.62052 | 0.66063 |
| 9 | 海南省人民政府办公厅关于印发海南省市县政府耕地保护责任目标考核办法的通知 | 2005年12月 | 0.01415 | 0.02008 |
| 10 | 河北省人民政府印发关于深化改革严格土地管理实施意见的通知 | 2004年12月 | 0.11190 | 0.14594 |
| 11 | 黑龙江省人民政府关于印发黑龙江省地市级政府耕地保护责任目标考核办法的通知 | 2007年3月 | 0.01725 | 0.01763 |
| 12 | 河南省人民政府关于贯彻《国务院关于深化改革严格土地管理的决定》的意见 | 2004年12月 | 0.28262 | 0.32027 |
| 13 | 湖北省人民政府关于进一步加强征地管理切实保护被征地农民合法权益的通知 | 2005年2月 | 0.08580 | 0.11655 |
| 14 | 湖南省人民政府关于深化改革严格土地管理的意见 | 2005年2月 | 0.23308 | 0.25857 |
| 15 | 吉林省人民政府关于深化改革严格土地管理的通知 | 2004年12月 | 0.34542 | 0.40989 |
| 16 | 江西省人民政府办公厅转发关于专项治理征地中损害农民利益问题等5个实施方案的通知 | 2005年5月 | 0.13136 | 0.12733 |
| 17 | 辽宁省人民政府关于深化改革严格土地管理的实施意见 | 2005年8月 | 0.38832 | 0.40500 |
| 18 | 内蒙古自治区人民政府贯彻落实国务院关于深化改革严格土地管理的决定的通知 | 2004年11月 | 0.10261 | 0.11802 |
| 19 | 宁夏回族自治区人民政府关于贯彻落实《国务院关于深化改革严格土地管理的决定》的意见 | 2005年5月 | 0.66210 | 0.75416 |
| 20 | 青海省人民政府关于贯彻国务院深化改革严格土地管理决定的实施意见 | 2005年4月 | 0.11234 | 0.13173 |
| 21 | 四川省人民政府贯彻落实《国务院关于深化改革严格土地管理的决定》的实施意见 | 2005年7月 | 0.32110 | 0.34721 |
| 22 | 山东省人民政府关于贯彻国发[2004]28号文件深化改革严格土地管理的实施意见 | 2004年12月 | 0.24724 | 0.27865 |
| 23 | 陕西省人民政府关于认真贯彻落实《国务院关于深化改革严格土地管理的决定》的通知 | 2004年12月 | 0.18620 | 0.23408 |
| 24 | 山西省人民政府关于国土资源管理体制改革的实施意见 | 2004年11月 | 0.04909 | 0.05485 |
| 25 | 天津市人民政府办公厅关于下达我市2005年土地利用计划的通知 | 2005年7月 | 0.01238 | 0.00979 |
| 26 | 西藏自治区人民政府贯彻国务院关于深化改革严格土地管理决定的通知 | 2005年3月 | 0.07386 | 0.07786 |
| 27 | 新疆维吾尔自治区人民政府转发国务院关于深化改革严格土地管理的决定的通知 | 2005年5月 | 0.02344 | 0.02693 |
| 28 | 云南省人民政府贯彻国务院关于深化改革严格土地管理决定的通知 | 2OO5年6月 | 0.25122 | 0.30167 |

Table C17:

| Provincial Documents Corresponding to Central Guideline #17:  国务院办公厅关于完善煤矿安全监察体制的意见 | | | | |
| --- | --- | --- | --- | --- |
| ID | Title of the document | Release Date | Straight Measure of  Content Coverage | Refined Content Coverage after Removing Formulaic Sentences |
| 1 | 安徽省人民政府办公厅转发国务院办公厅关于完善煤矿安全监察体制意见的通知 | 2005年4月 | 0.06780 | 0.10784 |
| 2 | 重庆市人民政府办公厅关于完善煤矿安全监察体制的实施意见 | 2005年1月 | 0.62712 | 0.68954 |
| 3 | 黑龙江省人民政府办公厅关于进一步加强国有重点煤矿安全生产监管工作的通知 | 2006年3月 | 0.09322 | 0.16993 |
| 4 | 湖南省人民政府办公厅关于进一步完善全省煤矿安全监察监管体制的意见 | 2005年6月 | 0.29661 | 0.54902 |
| 5 | 吉林省人民政府办公厅转发国务院办公厅关于完善煤矿安全监察体制意见的通知 | 2004年12月 | 0.18432 | 0.26144 |
| 6 | 江西省人民政府关于全省煤矿安全监管体制调整的通知 | 2005年6月 | 0.03390 | 0.04248 |
| 7 | 辽宁省人民政府办公厅关于进一步明确煤矿安全生产监管责任的通知 | 2005年5月 | 0.08475 | 0.12418 |
| 8 | 宁夏回族自治区人民政府办公厅关于进一步加强全区国有重点煤矿安全生产监管工作的通知 | 2008年6月 | 0.12924 | 0.18627 |
| 9 | 四川省人民政府办公厅关于加强煤矿安全监督管理工作的实施意见 | 2005年8月 | 0.46822 | 0.61765 |
| 10 | 山东省人民政府办公厅关于加强煤矿安全监管工作的意见 | 2005年9月 | 0.34110 | 0.37908 |
| 11 | 云南省人民政府办公厅关于完善全省煤矿安全监管体制有关问题的通知 | 2005年3月 | 0.07203 | 0.13072 |

Table C18:

| Provincial Documents Corresponding to Central Guideline #18:  国务院关于推进兽医管理体制改革的若干意见 | | | | |
| --- | --- | --- | --- | --- |
| ID | Title of the document | Release Date | Straight Measure of  Content Coverage | Refined Content Coverage after Removing Formulaic Sentences |
| 1 | 安徽省人民政府关于推进兽医管理体制改革的实施意见 | 2006年8月 | 0.30020 | 0.36943 |
| 2 | 北京市人民政府贯彻落实国务院关于推进兽医管理体制改革若干意见的实施意见 | 2006年7月 | 0.22718 | 0.27771 |
| 3 | 重庆市人民政府关于推进兽医管理体制改革的意见 | 2006年1月 | 0.27079 | 0.39363 |
| 4 | 福建省人民政府关于推进兽医管理体制改革的实施意见 | 2007年9月 | 0.44320 | 0.52102 |
| 5 | 广东省人民政府转发国务院关于推进兽医管理体制改革若干意见的通知 | 2005年8月 | 0.04665 | 0.03567 |
| 6 | 甘肃省人民政府关于贯彻落实国务院推进兽医管理体制改革若干意见的实施意见 | 2006年6月 | 0.24746 | 0.34013 |
| 7 | 广西壮族自治区人民政府关于推进兽医管理体制改革的实施意见 | 2006年7月 | 0.52333 | 0.49427 |
| 8 | 贵州省人民政府关于印发贵州省兽医管理体制改革实施方案的通知 | 2006年6月 | 0.27890 | 0.35541 |
| 9 | 河北省人民政府关于推进兽医管理体制改革的实施意见 | 2005年11月 | 0.23124 | 0.31465 |
| 10 | 黑龙江省人民政府关于推进兽医管理体制改革的意见 | 2006年3月 | 0.22718 | 0.31847 |
| 11 | 湖北省人民政府关于推进畜牧兽医管理体制改革的意见 | 2007年1月 | 0.20487 | 0.26369 |
| 12 | 湖南省人民政府关于推进兽医管理体制改革的实施意见 | 2007年7月 | 0.48276 | 0.58599 |
| 13 | 吉林省人民政府关于推进兽医管理体制改革的实施意见 | 2006年9月 | 0.32860 | 0.38089 |
| 14 | 江苏省人民政府关于推进兽医管理体制改革的意见 | 2005年9月 | 0.22921 | 0.29936 |
| 15 | 江西省人民政府关于推进畜牧兽医管理体制改革的实施意见 | 2006年7月 | 0.52028 | 0.63567 |
| 16 | 辽宁省人民政府关于推进市县动物卫生管理体制改革的实施意见 | 2005年12月 | 0.41785 | 0.49299 |
| 17 | 内蒙古自治区人民政府关于印发自治区兽医管理体制改革方案的通知 | 2005年12月 | 0.40162 | 0.36306 |
| 18 | 宁夏回族自治区人民政府关于推进兽医管理体制改革的实施意见 | 2006年3月 | 0.28296 | 0.33376 |
| 19 | 青海省人民政府关于推进兽医管理体制改革的实施意见 | 2007年5月 | 0.36410 | 0.34395 |
| 20 | 四川省人民政府关于推进兽医管理体制改革的意见 | 2006年6月 | 0.51826 | 0.54904 |
| 21 | 山东省人民政府关于兽医管理体制改革的意见 | 2006年11月 | 0.45335 | 0.59490 |
| 22 | 陕西省人民政府关于推进畜牧兽医管理体制改革的实施意见 | 2005年11月 | 0.42191 | 0.50318 |
| 23 | 山西省人民政府关于推进畜牧兽医管理体制改革的实施意见 | 2006年9月 | 0.28296 | 0.41274 |
| 24 | 天津市人民政府关于推进兽医管理体制改革的意见 | 2006年11月 | 0.27282 | 0.30064 |
| 25 | 西藏自治区人民政府关于印发西藏自治区兽医管理体制改革方案的通知 | 2006年8月 | 0.29108 | 0.30064 |
| 26 | 新疆维吾尔自治区人民政府关于贯彻国务院关于推进兽医管理体制改革若干意见的意见 | 2005年11月 | 0.33976 | 0.38471 |
| 27 | 云南省人民政府关于印发云南省兽医管理体制改革实施方案的通知 | 2006年5月 | 0.37120 | 0.44841 |
| 28 | 浙江省人民政府关于推进畜牧兽医体系改革切实加强动物防疫工作的通知 | 2005年6月 | 0.13185 | 0.16433 |

Table C19:

| Provincial Documents Corresponding to Central Guideline #19:  国务院办公厅关于加强车辆超限超载治理工作的通知 | | | | |
| --- | --- | --- | --- | --- |
| ID | Title of the document | Release Date | Straight Measure of  Content Coverage | Refined Content Coverage after Removing Formulaic Sentences |
| 1 | 北京市人民政府办公厅转发国务院办公厅关于加强车辆超限超载治理工作文件的通知 | 2005年6月 | 0.03067 | 0.03936 |
| 2 | 广东省人民政府办公厅转发国务院办公厅关于加强车辆超限超载治理工作的通知 | 2005年8月 | 0.12596 | 0.11808 |
| 3 | 甘肃省人民政府关于建立和完善治理超限超载车辆监控检测网络的通知 | 2006年1月 | 0.01972 | 0.02770 |
| 4 | 广西壮族自治区人民政府办公厅关于进一步加强车辆超限超载治理工作的通知 | 2005年7月 | 0.29573 | 0.58601 |
| 5 | 海南省人民政府办公厅关于印发海南省治理车辆超限超载工作方案的通知 | 2008年1月 | 0.21796 | 0.21866 |
| 6 | 河北省人民政府办公厅关于加强车辆超限超载治理工作的实施意见 | 2008年4月 | 0.17415 | 0.17638 |
| 7 | 河南省人民政府办公厅关于进一步加强车辆超限超载逃漏公路通行费和假冒军警公安车辆治理工作的通知 | 2005年6月 | 0.38335 | 0.44023 |
| 8 | 吉林省人民政府办公厅关于加强车辆超限超载治理工作的通知 | 2005年7月 | 0.18182 | 0.37464 |
| 9 | 辽宁省人民政府办公厅关于印发辽宁省开展车辆超限超载治理工作实施意见的通知 | 2005年6月 | 0.24206 | 0.25510 |
| 10 | 青海省人民政府办公厅转发省交通厅关于2005年青海省治理车辆超限超载工作实施方案的通知 | 2005年7月 | 0.26725 | 0.26093 |
| 11 | 四川省人民政府办公厅关于深入治理车辆超限超载工作的通知 | 2006年6月 | 0.22015 | 0.22741 |
| 12 | 山东省人民政府办公厅关于贯彻落实国务院办公厅国办发[2005]30号文件进—步 | 2005年8月 | 0.18839 | 0.24927 |
| 13 | 陕西省人民政府办公厅关于进一步加强车辆超限超载治理工作的通知 | 2006年1月 | 0.32202 | 0.34402 |
| 14 | 浙江省人民政府办公厅关于印发进一步加强车辆超限超载长效管理工作意见的通知 | 2009年12月 | 0.20263 | 0.21866 |

Table C20:

| Provincial Documents Corresponding to Central Guideline #20:  国务院办公厅关于进一步推进墙体材料革新和推广节能建筑的通知 | | | | |
| --- | --- | --- | --- | --- |
| ID | Title of the document | Release Date | Straight Measure of  Content Coverage | Refined Content Coverage after Removing Formulaic Sentences |
| 1 | 安徽省人民政府办公厅转发国务院办公厅关于进一步推进墙体材料革新和推广节能建筑的通知 | 2005年8月 | 0.07050 | 0.06674 |
| 2 | 重庆市人民政府办公厅转发市建委关于加强民用建筑节能管理工作意见的通知 | 2006年2月 | 0.05135 | 0.08258 |
| 3 | 福建省人民政府办公厅转发省经贸委、省建设厅关于进一步推进墙体材料革新和 | 2006年3月 | 0.19756 | 0.21946 |
| 4 | 广东省人民政府办公厅转发国务院办公厅关于进一步推进墙体材料革新和推广节能建筑的通知 | 2005年9月 | 0.07398 | 0.07353 |
| 5 | 甘肃省人民政府办公厅关于进一步推进墙体材料革新和推广节能建筑的通知 | 2006年3月 | 0.26458 | 0.30543 |
| 6 | 广西壮族自治区人民政府办公厅关于加快发展新型墙体材料和节能建筑的通知 | 2007年6月 | 0.16101 | 0.21041 |
| 7 | 贵州省人民政府关于推进墙体材料革新和建筑节能工作的意见 | 2006年8月 | 0.35074 | 0.38122 |
| 8 | 海南省人民政府关于印发《海南省发展应用新型墙体材料管理规定》的通知 | 2006年6月 | 0.14186 | 0.21493 |
| 9 | 黑龙江省人民政府办公厅关于进一步做好墙体材料革新和推广节能建筑工作的通知 | 2007年8月 | 0.12707 | 0.15837 |
| 10 | 河南省人民政府办公厅关于进一步推进墙体材料革新和推广节能建筑的通知 | 2005年10月 | 0.28111 | 0.29864 |
| 11 | 湖北省人民政府办公厅关于进一步做好推进墙体材料革新和推广节能建筑工作的通知 | 2006年3月 | 0.23499 | 0.27828 |
| 12 | 湖南省人民政府办公厅关于进一步推进墙体材料革新和推广节能建筑的通知 | 2006年2月 | 0.30287 | 0.45136 |
| 13 | 吉林省人民政府办公厅转发省建设厅关于进一步推进墙体材料革新和推广节能建筑意见的通知 | 2005年8月 | 0.14621 | 0.16063 |
| 14 | 江苏省政府办公厅关于转发省经贸委等部门关于进一步推进墙体材料革新和实施建筑节能意见的通知 | 2005年12月 | 0.25413 | 0.35068 |
| 15 | 江西省人民政府办公厅关于印发进一步推进墙体材料革新和推广节能建筑实施意见的通知 | 2005年12月 | 0.61967 | 0.70362 |
| 16 | 辽宁省人民政府办公厅转发省经委关于进一步推进墙体材料革新工作意见的通知 | 2006年7月 | 0.21149 | 0.29977 |
| 17 | 宁夏回族自治区人民政府办公厅关于进一步推进墙体材料革新和推广节能建筑的通知 | 2005年10月 | 0.15492 | 0.20136 |
| 18 | 四川省人民政府办公厅关于贯彻《国务院办公厅关于进一步推动墙体材料革新和推广节能建筑的通知》的通知 | 2005年12月 | 0.30026 | 0.36878 |
| 19 | 山东省新型墙体材料发展应用与建筑节能管理规定 | 2005年9月 | 0.15057 | 0.18552 |
| 20 | 上海市建筑节能管理办法 | 2005年6月 | 0.05918 | 0.08824 |
| 21 | 陕西省人民政府办公厅关于进一步推进墙体材料革新和推广节能建筑的实施意见 | 2005年1月 | 0.27415 | 0.28281 |
| 22 | 天津市人民政府批转市建委关于2005至2006年建筑节能和资源节约工作指导意见的通知 | 2005年9月 | 0.11836 | 0.12557 |
| 23 | 新疆维吾尔自治区促进新型墙体发展应用条例 | 2008年1月 | 0.15579 | 0.18439 |
| 24 | 云南省人民政府办公厅转发国务院办公厅关于进一步推进墙体材料革新和推广节能建筑文件的通知 | 2OO5年7月 | 0.07485 | 0.07692 |
| 25 | 浙江省人民政府办公厅关于加强建筑节能工作的通知 | 2005年7月 | 0.13229 | 0.14253 |

Table C21:

| Provincial Documents Corresponding to Central Guideline #21:  国务院关于做好建设节约型社会近期重点工作的通知 | | | | |
| --- | --- | --- | --- | --- |
| ID | Title of the document | Release Date | Straight Measure of  Content Coverage | Refined Content Coverage after Removing Formulaic Sentences |
| 1 | 安徽省人民政府办公厅关于印发安徽省建设节约型社会近期重点工作实施方案的通知 | 2005年1月 | 0.17559 | 0.23256 |
| 2 | 北京市十一五时期循环经济发展规划 | 2006年12月 | 0.20192 | 0.21079 |
| 3 | 重庆市人民政府关于建设节约型社会近期工作的意见 | 2005年7月 | 0.17182 | 0.19050 |
| 4 | 福建省人民政府印发贯彻国务院关于做好建设节约型社会近期重点工作实施意见的通知的通知 | 2005年12月 | 0.28052 | 0.38496 |
| 5 | 广东省人民政府关于建设节约型社会发展循环经济的若干意见 | 2005年9月 | 0.28219 | 0.28946 |
| 6 | 甘肃省人民政府办公厅批转省经委、省统计局关于实行节能降耗目标责任考核管理意见的通知 | 2006年4月 | 0.02132 | 0.02078 |
| 7 | 广西壮族自治区人民政府关于做好我区建设节约型社会近期工作的通知 | 2005年11月 | 0.30978 | 0.32954 |
| 8 | 贵州省人民政府关于贯彻国务院做好建设节约型社会近期重点工作通知的实施意见 | 2006年1月 | 0.38796 | 0.40178 |
| 9 | 海南省人民政府关于印发海南省建设节约型社会近期重点工作实施方案的通知 | 2006年8月 | 0.17851 | 0.19099 |
| 10 | 河北省人民政府关于做好建设节约型社会近期重点工作的实施意见 | 2005年9月 | 0.19356 | 0.22810 |
| 11 | 黑龙江省人民政府关于加快建设节约型社会近期重点工作的实施意见 | 2005年11月 | 0.26171 | 0.28996 |
| 12 | 河南省人民政府关于加快节约型社会建设的通知 | 2005年12月 | 0.29473 | 0.33498 |
| 13 | 湖北省人民政府关于做好建设节约型社会近期重点工作的意见 | 2005年9月 | 0.43144 | 0.49926 |
| 14 | 中共湖南省委、湖南省人民政府关于大力发展循环经济建设资源节约型和环境友好型社会的意见 | 2006年7月 | 0.18102 | 0.17862 |
| 15 | 吉林省人民政府关于批转省发改委制定的吉林省建设节约型社会实施方案的通知 | 2005年8月 | 0.18144 | 0.15141 |
| 16 | 江苏省人民政府关于印发推进节约型社会建设若干政策措施的通知 | 2006年5月 | 0.02467 | 0.03018 |
| 17 | 江西省人民政府办公厅关于印发江西省发展循环经济和建设节约型社会工作分工方案的通知 | 2006年8月 | 0.13336 | 0.17219 |
| 18 | 辽宁省人民政府关于做好建设节约型社会重点工作的通知 | 2006年1月 | 0.17349 | 0.20089 |
| 19 | 内蒙古自治区人民政府关于建设节水型社会的实施意见 | 2007年5月 | 0.10326 | 0.12519 |
| 20 | 宁夏回族自治区人民政府办公厅转发自治区经委、统计局《关于加强重点用能单位节能工作的意见》的通知 | 2006年6月 | 0.06313 | 0.05641 |
| 21 | 青海省人民政府关于做好建设节约型社会近期重点工作的安排意见 | 2005年11月 | 0.11497 | 0.12469 |
| 22 | 四川省人民政府关于做好建设节约型社会近期重点工作的通知 | 2005年9月 | 0.20151 | 0.22712 |
| 23 | 山东省人民政府关于发展循环经济，建设资源节约型社会的意见 | 2005年6月 | 0.09114 | 0.10292 |
| 24 | 上海市人民政府印发关于本市贯彻《国务院关于做好建设节约型社会近期重点工作的通知》实施意见的通知 | 2005年8月 | 0.15803 | 0.17566 |
| 25 | 陕西省人民政府关于做好建设节约型社会近期重点工作的通知 | 2005年9月 | 0.17768 | 0.23899 |
| 26 | 山西省人民政府关于贯彻落实《国务院关于做好建设节约型社会近期重点工作的通知》的实施意见 | 2005年9月 | 0.08110 | 0.10094 |
| 27 | 天津市人民政府批转市发展改革委、市经委、市环保局关于发展循环经济建设节约型社会近期重点工作实施意见的通知 | 2006年6月 | 0.17684 | 0.18110 |
| 28 | 云南省人民政府关于贯彻国务院建设节约型社会近期重点工作实施意见的通知 | 2005年7月 | 0.12751 | 0.16724 |
| 29 | 浙江省人民政府贯彻国务院关于建设节约型社会重点工作的实施意见 | 2005年8月 | 0.18855 | 0.27264 |

Table C22:

| Provincial Documents Corresponding to Central Guideline #22:  国务院办公厅关于加强饮用水安全保障工作的通知 | | | | |
| --- | --- | --- | --- | --- |
| ID | Title of the document | Release Date | Straight Measure of  Content Coverage | Refined Content Coverage after Removing Formulaic Sentences |
| 1 | 安徽省人民政府办公厅转发国务院办公厅关于加强饮用水安全保障工作的通知的通知 | 2005年1月 | 0.09493 | 0.12264 |
| 2 | 重庆市人民政府办公厅关于加强城乡饮水安全工作的通知 | 2008年7月 | 0.10923 | 0.11887 |
| 3 | 福建省人民政府办公厅关于加强饮用水安全保障工作的意见 | 2005年1月 | 0.27308 | 0.44528 |
| 4 | 广东省人民政府办公厅转发国务院办公厅关于加强饮用水安全保障工作的通知 | 2005年1月 | 0.09883 | 0.14528 |
| 5 | 广西壮族自治区人民政府关于加强农村饮水安全保障工作的通知 | 2006年6月 | 0.27828 | 0.26981 |
| 6 | 贵州省人民政府办公厅关于加强饮用水安全保障工作的通知 | 2006年3月 | 0.39792 | 0.55283 |
| 7 | 河北省人民政府办公厅关于进一步加强饮用水安全保障工作的通知 | 2006年4月 | 0.27568 | 0.66604 |
| 8 | 湖北省人民政府关于加强农村饮水安全工程建设和管理的意见 | 2007年2月 | 0.15735 | 0.17925 |
| 9 | 湖南省人民政府办公厅关于加强农村饮水安全工作的意见 | 2007年8月 | 0.17295 | 0.20189 |
| 10 | 辽宁省爱国卫生运动委员会办公室、辽宁省卫生厅关于印发《辽宁省农村饮水安全工程卫生学评价实施细则》的通知 | 2008年9月 | 0.11443 | 0.13396 |
| 11 | 内蒙古自治区人民政府办公厅关于自治区人畜饮水领导小组变更为自治区饮水安全领导小组的通知 | 2007年9月 | 0.00520 | 0.00755 |
| 12 | 青海省人民政府办公厅关于加强饮用水安全保障工作的通知 | 2005年11月 | 0.17555 | 0.36226 |
| 13 | 四川省人民政府办公厅关于加强城镇饮用水安全保障工作的通知 | 2006年2月 | 0.22107 | 0.29434 |
| 14 | 山东省人民政府办公厅关于进一步加强饮用水安全保障工作的通知 | 2006年11月 | 0.33550 | 0.43774 |
| 15 | 陕西省人民政府办公厅关于加强饮用水安全保障工作的通知 | 2006年5月 | 0.30429 | 0.48113 |
| 16 | 天津市人民政府办公厅转发市建委等六部门关于加强饮用水安全保障工作实施意见的通知 | 2006年4月 | 0.18856 | 0.25472 |
| 17 | 云南省人民政府办公厅转发国务院办公厅关于加强饮用水安全保障工作文件的通知 | 2005年1月 | 0.10143 | 0.09623 |
| 18 | 浙江省人民政府关于切实加强城乡饮用水安全保障工作的通知 | 2006年2月 | 0.36801 | 0.42453 |

Table C23:

| Provincial Documents Corresponding to Central Guideline #23:  国务院关于全面整顿和规范矿产资源开发秩序的通知 | | | | |
| --- | --- | --- | --- | --- |
| ID | Title of the document | Release Date | Straight Measure of  Content Coverage | Refined Content Coverage after Removing Formulaic Sentences |
| 1 | 安徽省人民政府转发国务院关于全面整顿和规范矿产资源开发秩序的通知皖政[2005]95号 | 2005年1月 | 0.01393 | 0.01512 |
| 2 | 北京市人民政府办公厅关于进一步整顿和规范矿产资源开发秩序的通知 | 2005年1月 | 0.06017 | 0.08135 |
| 3 | 重庆市人民政府转发国务院关于全面整顿和规范矿产资源开发秩序通知的通知 | 2005年11月 | 0.06741 | 0.06192 |
| 4 | 福建省人民政府关于贯彻落实国务院全面整顿和规范矿产资源开发秩序的实施意见 | 2005年1月 | 0.14875 | 0.24046 |
| 5 | 广东省人民政府办公厅印发广东省全面整顿和规范矿产资源开发秩序工作方案的通知 | 2005年12月 | 0.24457 | 0.29086 |
| 6 | 广西壮族自治区人民政府办公厅关于印发广西壮族自治区全面整顿和规范矿产资源开发秩序工作实施方案的通知 | 2005年11月 | 0.50418 | 0.61987 |
| 7 | 贵州省人民政府办公厅转发省国土资源厅关于全面整顿和规范矿产资源开发秩序实施意见的通知 | 2005年12月 | 0.30028 | 0.35925 |
| 8 | 海南省人民政府办公厅关于印发海南省全面整顿和规范矿产资源开发秩序实施方案的通知 | 2005年11月 | 0.27799 | 0.34125 |
| 9 | 河北省人民政府办公厅关于印发《河北省整顿和规范矿产资源开发秩序实施方案》的通知 | 2005年12月 | 0.26462 | 0.34485 |
| 10 | 河南省人民政府贯彻国务院关于全面整顿和规范矿产资源开发秩序通知的意见 | 2005年12月 | 0.39777 | 0.54572 |
| 11 | 湖北省人民政府关于全面整顿和规范全省矿产资源开发秩序的通知 | 2005年12月 | 0.23565 | 0.31605 |
| 12 | 湖南省人民政府关于全面整顿和规范矿产资源开发秩序的通知 | 2005年12月 | 0.20390 | 0.28222 |
| 13 | 江西省人民政府办公厅关于印发全面整顿和规范矿产资源开发秩序实施方案的通知 | 2005年12月 | 0.43120 | 0.64651 |
| 14 | 辽宁省人民政府关于印发辽宁省全面整顿和规范矿产资源开发秩序实施方案的通知 | 2005年9月 | 0.28635 | 0.31030 |
| 15 | 宁夏回族自治区人民政府关于贯彻落实《国务院关于全面整顿和规范矿产资源开发秩序的通知》的实施意见 | 2005年11月 | 0.47019 | 0.68467 |
| 16 | 青海省人民政府关于贯彻国务院全面整顿和规范矿产资源开发秩序通知的实施意见 | 2005年11月 | 0.25738 | 0.33837 |
| 17 | 四川省人民政府关于进一步加强整顿和规范矿产资源开发秩序工作的通知 | 2005年11月 | 0.13928 | 0.20590 |
| 18 | 山东省人民政府关于贯彻国发[2005]28号文件全面整顿和规范矿产资源开发秩序的通知 | 2005年1月 | 0.16435 | 0.32613 |
| 19 | 陕西省人民政府关于全面整顿和规范矿产资源开发秩序的通知 | 2005年11月 | 0.30864 | 0.37437 |
| 20 | 山西省人民政府关于印发山西省全面整顿和规范矿产资源开发秩序实施方案的通知 | 2005年12月 | 0.26852 | 0.33477 |
| 21 | 天津市人民政府批转市国土房管局关于全面整顿和规范矿产资源开发秩序实施方案的通知 | 2005年11月 | 0.18106 | 0.25414 |
| 22 | 西藏自治区人民政府办公厅关于成立自治区整顿和规范矿产资源开发秩序工作领导小组的通知 | 2005年1月 | 0.00836 | 0.01008 |
| 23 | 云南省人民政府转发国务院关于全面整顿和规范矿产资源开发秩序文件的通知 | 2005年9月 | 0.12089 | 0.15119 |
| 24 | 浙江省人民政府关于全面整顿和规范矿产资源开发秩序的实施意见 | 2005年12月 | 0.26685 | 0.33405 |

Table C24:

| Provincial Documents Corresponding to Central Guideline #24:  国务院关于进一步加强防沙治沙工作的决定 | | | | |
| --- | --- | --- | --- | --- |
| ID | Title of the document | Release Date | Straight Measure of  Content Coverage | Refined Content Coverage after Removing Formulaic Sentences |
| 1 | 北京市人民政府关于进一步加强防沙治沙工作的意见 | 2006年9月 | 0.13728 | 0.15186 |
| 2 | 甘肃省人民政府关于进一步加强防沙治沙工作的意见 | 2008年3月 | 0.21879 | 0.26361 |
| 3 | 河北省人民政府办公厅关于转发省林业局等部门河北省防沙治沙目标责任考核办法的通知 | 2009年5月 | 0.02059 | 0.01862 |
| 4 | 河南省人民政府关于进一步加强防沙治沙工作的意见 | 2007年9月 | 0.09009 | 0.10029 |
| 5 | 吉林省人民政府关于进一步加强防沙治沙7号) | 2008年4月 | 0.19048 | 0.19675 |
| 6 | 辽宁省人民政府关于进一步加强防沙治沙工作的实施意见 | 2007年9月 | 0.18490 | 0.21777 |
| 7 | 内蒙古自治区人民政府关于切实加强防沙治沙工作的决定 | 2008年1月 | 0.21965 | 0.24976 |
| 8 | 宁夏回族自治区人民政府关于进一步加强防沙治沙工作的意见 | 2007年10月 | 0.13213 | 0.14279 |
| 9 | 青海省人民政府关于贯彻《国务院关于进一步加强防沙治沙工作的决定》的实施意见 | 2006年6月 | 0.50622 | 0.55969 |
| 10 | 四川省人民政府办公厅关于加强我省防沙治沙工作的通知 | 2005年11月 | 0.03475 | 0.03391 |
| 11 | 陕西省人民政府关于进一步加强防沙治沙工作的意见 | 2006年12月 | 0.22265 | 0.27030 |
| 12 | 山西省人民政府关于进一步加强全省防沙治沙工作的实施意见 | 2006年1月 | 0.04934 | 0.03964 |
| 13 | 西藏自治区人民政府办公厅转发自治区林业局等部门关于西藏自治区防沙治沙目标责任考核办法的通知 | 2009年7月 | 0.02617 | 0.02961 |
| 14 | 新疆维吾尔自治区实施《中华人民共和国防沙治沙法》办法 | 2008年5月 | 0.07550 | 0.08787 |

Table C25:

| Provincial Documents Corresponding to Central Guideline #25:  国务院办公厅关于印发《省级政府耕地保护责任目标考核办法》的通知 | | | | |
| --- | --- | --- | --- | --- |
| ID | Title of the document | Release Date | Straight Measure of  Content Coverage | Refined Content Coverage after Removing Formulaic Sentences |
| 1 | 安徽省人民政府办公厅关于印发各市政府耕地保护责任目标考核办法的通知皖政办[2005]70号 | 2005年12月 | 0.46380 | 0.53776 |
| 2 | 重庆市人民政府办公厅关于印发重庆市耕地保护责任目标考核办法的通知 | 2006年5月 | 0.54751 | 0.54683 |
| 3 | 福建省人民政府办公厅关于印发设区市政府耕地保护责任目标考核办法的通知 | 2006年1月 | 0.79186 | 0.82477 |
| 4 | 广东省人民政府办公厅印发广东省地级以上市人民政府耕地保护责任目标考核办法的通知 | 2006年3月 | 0.69231 | 0.73414 |
| 5 | 甘肃省人民政府办公厅关于印发《市级政府耕地保护责任目标考核办法》的通知 | 2006年6月 | 0.82805 | 0.82477 |
| 6 | 广西壮族自治区人民政府办公厅关于印发《广西壮族自治区耕地保护责任目标考核办法》的通知 | 2006年2月 | 0.83032 | 0.85498 |
| 7 | 贵州省人民政府办公厅关于印发《市州地人民政府（行署）耕地保护责任目标考核办法》的通知 | 2006年6月 | 0.79864 | 0.84592 |
| 8 | 海南省人民政府办公厅关于印发海南省市县政府耕地保护责任目标考核办法的通知 | 2005年12月 | 0.82127 | 0.84894 |
| 9 | 河北省人民政府办公厅关于印发《设区市政府耕地保护责任目标考核办法》的通知 | 2005年12月 | 0.82127 | 0.82779 |
| 10 | 黑龙江省人民政府关于印发黑龙江省地市级政府耕地保护责任目标考核办法的通知 | 2007年3月 | 0.60407 | 0.67372 |
| 11 | 河南省人民政府办公厅关于印发省辖市政府耕地保护责任目标考核办法的通知 | 2006年6月 | 0.60407 | 0.73716 |
| 12 | 湖北省人民政府办公厅关于印发《市州级政府耕地保护责任目标考核办法》的通知 | 2006年8月 | 0.55882 | 0.64653 |
| 13 | 湖南省人民政府办公厅市州政府耕地保护责任目标考核办法 | 2006年3月 | 0.59955 | 0.76133 |
| 14 | 江苏省人民政府办公厅关于印发江苏省市级政府耕地保护责任目标考核办法的通知 | 2006年7月 | 0.71267 | 0.68882 |
| 15 | 江西省人民政府办公厅关于印发江西省设区市级政府耕地保护责任目标考核办法的通知 | 2006年11月 | 0.60407 | 0.70091 |
| 16 | 辽宁省人民政府办公厅关于印发市级政府耕地保护责任目标考核办法的通知 | 2006年2月 | 0.52489 | 0.52870 |
| 17 | 宁夏回族自治区人民政府关于表彰奖励2006年度耕地保护目标责任书考核先进市的决定 | 2007年1月 | 0.05430 | 0.06344 |
| 18 | 青海省实施《中华人民共和国土地管理法》办法（1990年8月31日青海省第七届人民代表大会常务委员会第十六次会议通过 | 2006年7月 | 0.17647 | 0.20242 |
| 19 | 山东省人民政府办公厅关于印发《山东省市级政府耕地保护责任目标考核办法》的通知 | 2006年1月 | 0.80090 | 0.81571 |
| 20 | 陕西省人民政府办公厅关于印发 《陕西省市级政府耕地保护责任目标考核办法》的通知 | 2005年12月 | 0.83710 | 0.83988 |
| 21 | 山西省人民政府办公厅关于印发《山西省市级人民政府耕地保护责任目标考核办法》的通知 | 2007年8月 | 0.72398 | 0.70091 |
| 22 | 天津市人民政府办公厅关于印发区县人民政府耕地保护责任目标考核办法的通知 | 2006年5月 | 0.61312 | 0.54381 |
| 23 | 西藏自治区人民政府办公室关于印发地级政府耕地保护责任目标考核办法的通知 | 2007年3月 | 0.77602 | 0.78550 |
| 24 | 云南省人民政府关于切实加强土地管理严格落实耕地保护责任的通知 | 2007年6月 | 0.18778 | 0.18429 |

Table C26:

| Provincial Documents Corresponding to Central Guideline #26:  国务院关于落实科学发展观加强环境保护的决定 | | | | |
| --- | --- | --- | --- | --- |
| ID | Title of the document | Release Date | Straight Measure of  Content Coverage | Refined Content Coverage after Removing Formulaic Sentences |
| 1 | 安徽省人民政府贯彻国务院关于落实科学发展观加强环境保护决定的实施意见 | 2006年9月 | 0.10250 | 0.12412 |
| 2 | 北京市人民政府贯彻国务院关于落实科学发展观加强环境保护决定的意见 | 2006年11月 | 0.10191 | 0.11543 |
| 3 | 重庆市人民政府办公厅关于印发“十一五”化学需氧量及二氧化硫总量控制计划的通知 | 2006年8月 | 0.00626 | 0.00900 |
| 4 | 福建省人民政府关于落实科学发展观加强环境保护的实施意见 | 2006年6月 | 0.16806 | 0.19260 |
| 5 | 广东省人民政府转发国务院关于落实科学发展观加强环境保护决定的通知 | 2006年3月 | 0.01400 | 0.01383 |
| 6 | 甘肃省人民政府关于落实科学发展观加强环境保护的意见 | 2006年9月 | 0.19547 | 0.20836 |
| 7 | 贵州省人民政府关于落实科学发展观加强环境保护的决定 | 2006年1月 | 0.28814 | 0.32958 |
| 8 | 海南省人民政府贯彻国务院关于落实科学发展观加强环境保护的决定的实施意见 | 2006年7月 | 0.12396 | 0.14823 |
| 9 | 黑龙江省人民政府关于印发黑龙江省环境保护“十一五”规划的通知 | 2007年1月 | 0.21037 | 0.20772 |
| 10 | 河南省人民政府贯彻国务院关于落实科学发展观加强环境保护决定的实施意见 | 2006年7月 | 0.14273 | 0.17814 |
| 11 | 湖北省人民政府关于落实科学发展观加强环境保护的决定 | 2006年1月 | 0.14839 | 0.18392 |
| 12 | 湖南省人民政府关于落实科学发展观切实加强环境保护的决定 | 2006年9月 | 0.13141 | 0.15466 |
| 13 | 吉林省人民政府办公厅关于转发省环保局等部门制定的2006年整治违法排污企业保障群众健康环保专项行动工作方案的通知 | 2006年6月 | 0.02712 | 0.03087 |
| 14 | 江苏省政府办公厅关于印发江苏省“十一五”水污染物总量削减目标责任书的通知 | 2006年9月 | 0.02861 | 0.04180 |
| 15 | 江西省人民政府关于全面落实科学发展观加强环境保护的若干意见 | 2006年12月 | 0.21007 | 0.24598 |
| 16 | 辽宁省人民政府关于落实科学发展观加强环境保护的决定 | 2006年9月 | 0.17878 | 0.21865 |
| 17 | 内蒙古自治区人民政府办公厅关于印发“十一五”期间主要污染物排放总量控制计划的通知 | 2006年10月 | 0.00924 | 0.01447 |
| 18 | 宁夏回族自治区党委、人民政府关于落实科学发展观进一步加强环境保护的决定 | 2006年12月 | 0.13588 | 0.21704 |
| 19 | 青海省人民政府关于贯彻《国务院关于落实科学发展观加强环境保护的决定》的实施意见 | 2006年7月 | 0.29440 | 0.34727 |
| 20 | 四川省人民政府关于进一步加强城市环境综合整治工作的通知 | 2006年6月 | 0.02205 | 0.02315 |
| 21 | 山东省人民政府关于贯彻国发[2005]39号文件进一步落实科学发展观加强环境保护的实施意见 | 2006年6月 | 0.14541 | 0.16077 |
| 22 | 上海市人民政府关于贯彻《国务院关于落实科学发展观加强环境保护的决定》的意见 | 2006年8月 | 0.07807 | 0.09260 |
| 23 | 陕西省人民政府贯彻国务院关于落实科学发展观加强环境保护的决定的实施意见 | 2006年1月 | 0.15256 | 0.17814 |
| 24 | 山西省人民政府贯彻国务院关于落实科学发展观加强环境保护的决定的实施意见 | 2006年6月 | 0.17044 | 0.19839 |
| 25 | 天津市人民政府关于加强环境保护优化经济增长的决定 | 2006年9月 | 0.07360 | 0.08617 |
| 26 | 西藏自治区人民政府实施国务院关于落实科学发展观加强环境保护的决定的意见 | 2007年2月 | 0.15614 | 0.16656 |
| 27 | 新疆维吾尔自治区人民政府办公厅关于印发2008年自治区整治违法排污企业保障群众健康环保专项行动实施方案的通知 | 2008年7月 | 0.03903 | 0.05016 |

Table C27:

| Provincial Documents Corresponding to Central Guideline #27:  国务院办公厅关于印发中国遏制与防治艾滋病行动计划（2006－2010年）的通知 | | | | |
| --- | --- | --- | --- | --- |
| ID | Title of the document | Release Date | Straight Measure of  Content Coverage | Refined Content Coverage after Removing Formulaic Sentences |
| 1 | 安徽省人民政府办公厅关于印发安徽省遏制与防治艾滋病行动计划的通知 | 2006年6月 | 0.61453 | 0.71618 |
| 2 | 北京市防治艾滋病工作委员会办公室关于印发《北京市艾滋病监测工作管理办法》的通知 | 2007年11月 | 0.01967 | 0.02283 |
| 3 | 福建省人民政府办公厅转发省卫生厅关于福建省遏制与防治艾滋病行动计划的通知 | 2006年8月 | 0.88039 | 0.92127 |
| 4 | 广东省人民政府办公厅印发广东省遏制与防治艾滋病行动方案的通知 | 2006年12月 | 0.24175 | 0.27225 |
| 5 | 甘肃省人民政府办公厅关于印发甘肃省遏制与防治艾滋病行动计划 | 2006年12月 | 0.40070 | 0.43334 |
| 6 | 广西壮族自治区人民政府办公厅关于印发广西壮族自治区遏制与防治艾滋病行动计划 | 2007年8月 | 0.54727 | 0.59544 |
| 7 | 河北省人民政府办公厅关于印发《河北省遏制与防治艾滋病行动计划》的通知 | 2006年6月 | 0.11865 | 0.12603 |
| 8 | 黑龙江省人民政府办公厅关于印发黑龙江省遏制与防治艾滋病行动计划的通知 | 2006年11月 | 0.72272 | 0.80880 |
| 9 | 河南省人民政府办公厅关于印发河南省实施中国遏制与防治艾滋病行动计划意见的通知 | 2007年1月 | 0.58217 | 0.68045 |
| 10 | 湖北省人民政府办公厅关于印发湖北省遏制与防治艾滋病行动计划的通知 | 2006年11月 | 0.37310 | 0.40457 |
| 11 | 湖南省人民政府办公厅关于印发《湖南省遏制与防治艾滋病行动计划 | 2006年1月 | 0.78331 | 0.81211 |
| 12 | 江苏省政府办公厅关于印发江苏省艾滋病防治规划 | 2007年12月 | 0.42830 | 0.54813 |
| 13 | 江西省人民政府办公厅关于印发江西省遏制与防治艾滋病行动计划的通知 | 2007年2月 | 0.71447 | 0.79987 |
| 14 | 辽宁省人民政府办公厅关于印发辽宁省遏制与防治艾滋病行动计划的通知 | 2006年7月 | 0.30362 | 0.41317 |
| 15 | 宁夏回族自治区人民政府办公厅关于印发《宁夏回族自治区遏制与防治艾滋病行动计划》的通知 | 2006年8月 | 0.45495 | 0.63083 |
| 16 | 青海省人民政府办公厅关于印发青海省遏制与防治艾滋病实施计划的通知 | 2006年4月 | 0.72049 | 0.81740 |
| 17 | 四川省人民政府办公厅关于贯彻实施《艾滋病防治条例》的通知 | 2006年5月 | 0.02887 | 0.03010 |
| 18 | 山东省人民政府办公厅关于印发山东省贯彻《中国遏制与防治艾滋病行动计划 | 2006年8月 | 0.29188 | 0.32087 |
| 19 | 上海市人民政府办公厅关于印发上海市遏制与防治艾滋病行动计划的通知 | 2006年12月 | 0.37119 | 0.49421 |
| 20 | 陕西省人民政府办公厅关于印发陕西省遏制与防治艾滋病行动计划的通知 | 2006年1月 | 0.72049 | 0.80814 |
| 21 | 山西省人民政府办公厅关于印发山西省遏制与防治艾滋病行动计划实施方案的通知 | 2006年12月 | 0.26459 | 0.29209 |
| 22 | 云南省人民政府办公厅关于印发云南省遏制与防治艾滋病行动计划的通知 | 2006年8月 | 0.72208 | 0.76646 |

Table C28:

| Provincial Documents Corresponding to Central Guideline #28:  国务院关于进一步加强消防工作的意见 | | | | |
| --- | --- | --- | --- | --- |
| ID | Title of the document | Release Date | Straight Measure of  Content Coverage | Refined Content Coverage after Removing Formulaic Sentences |
| 1 | 安徽省人民政府关于进一步加强消防工作的通知 | 2006年8月 | 0.13864 | 0.17660 |
| 2 | 北京市人民政府关于加强“十一五”时期消防工作的意见 | 2006年12月 | 0.33438 | 0.39078 |
| 3 | 重庆市人民政府关于加强“十一五”期间消防工作的意见 | 2006年6月 | 0.18193 | 0.18369 |
| 4 | 福建省人民政府批转省公安厅、省发改委关于福建省十一五消防工作专项规划的通知 | 2006年8月 | 0.33626 | 0.37943 |
| 5 | 广东省人民政府关于切实加强全省消防工作的通知 | 2006年9月 | 0.16311 | 0.16809 |
| 6 | 甘肃省人民政府关于进一步加强消防工作的意见 | 2006年6月 | 0.23839 | 0.32908 |
| 7 | 广西壮族自治区人民政府关于进一步加强当前消防工作的意见 | 2006年9月 | 0.54329 | 0.60993 |
| 8 | 贵州省人民政府关于贯彻国务院进一步加强消防工作意见的实施意见 | 2006年8月 | 0.77227 | 0.85532 |
| 9 | 海南省人民政府关于进一步加强消防工作的意见 | 2006年8月 | 0.64617 | 0.68582 |
| 10 | 河北省人民政府关于进一步加强消防工作的实施意见 | 2007年3月 | 0.20075 | 0.22766 |
| 11 | 黑龙江省人民政府关于进一步加强消防工作的意见黑政发[2006]91号 | 2006年11月 | 0.17064 | 0.23617 |
| 12 | 湖北省人民政府关于进一步加强全省消防工作的意见 | 2006年11月 | 0.52070 | 0.56383 |
| 13 | 吉林省人民政府关于进一步加强消防工作的实施意见 | 2006年12月 | 0.11104 | 0.16667 |
| 14 | 江苏省人民政府办公厅关于印发江苏省“十一五”消防事业发展规划的通知 | 2007年4月 | 0.18570 | 0.19716 |
| 15 | 江西省人民政府关于进一步加强消防工作的实施意见 | 2006年7月 | 0.29987 | 0.43830 |
| 16 | 辽宁省人民政府办公厅转发省公安厅等部门关于加强多种形式消防队伍建设实施意见的通知 | 2006年11月 | 0.05207 | 0.07518 |
| 17 | 宁夏回族自治区人民政府关于进一步加强消防工作的意见 | 2006年12月 | 0.86324 | 0.85674 |
| 18 | 青海省人民政府关于进一步加强消防工作的意见 | 2007年1月 | 0.20201 | 0.24397 |
| 19 | 山东省人民政府关于贯彻国发〔2006〕15号文件进一步加强消防工作的意见 | 2006年1月 | 0.28607 | 0.38085 |
| 20 | 陕西省人民政府关于进一步加强和改进消防工作的意见 | 2006年12月 | 0.44981 | 0.47163 |
| 21 | 山西省人民政府关于进一步加强消防工作的实施意见 | 2006年12月 | 0.74216 | 0.73333 |
| 22 | 天津市人民政府批转市公安局关于进一步加强消防工作实施意见的通知 | 2006年9月 | 0.57403 | 0.72908 |
| 23 | 西藏自治区人民政府关于贯彻落实国务院进一步加强消防工作意见的通知 | 2006年9月 | 0.20138 | 0.23333 |
| 24 | 新疆维吾尔自治区人民政府办公厅转发自治区公安厅消防局关于进一步加强工业园区消防工作意见的通知 | 2007年9月 | 0.03639 | 0.06454 |
| 25 | 云南省人民政府关于进一步加强消防工作的决定 | 2006年9月 | 0.83061 | 0.85319 |

Table C29:

| Provincial Documents Corresponding to Central Guideline #29:  国务院办公厅关于推进种子管理体制改革加强市场监管的意见 | | | | |
| --- | --- | --- | --- | --- |
| ID | Title of the document | Release Date | Straight Measure of  Content Coverage | Refined Content Coverage after Removing Formulaic Sentences |
| 1 | 安徽省人民政府办公厅转发国务院办公厅关于推进种子管理体制改革加强市场监管意见的通知 | 2006年8月 | 0.06383 | 0.08261 |
| 2 | 北京市人民政府办公厅关于印发北京市推进种子管理体制改革加强市场监管工作实施意见的通知 | 2006年12月 | 0.19757 | 0.25647 |
| 3 | 福建省人民政府办公厅关于印发福建省推进种子管理体制改革加强市场监管实施方案的通知 | 2006年12月 | 0.22492 | 0.28607 |
| 4 | 广东省人民政府办公厅转发省农业厅关于推进种子管理体制改革加强市场监管的实施意见的通知 | 2007年4月 | 0.25532 | 0.31936 |
| 5 | 广西壮族自治区人民政府办公厅关于印发广西壮族自治区推进种子管理体制改革加强市场监管实施方案的通知 | 2006年12月 | 0.53293 | 0.67324 |
| 6 | 贵州省人民政府办公厅关于推进种子管理体制改革加强市场监管的实施意见 | 2007年4月 | 0.63830 | 0.73120 |
| 7 | 海南省人民政府办公厅关于推进种子管理体制改革加强市场监管实施意见的通知 | 2007年5月 | 0.11955 | 0.16276 |
| 8 | 河北省人民政府办公厅关于推进种子实施意见管理体制改革加强市场监管的通知 | 2006年12月 | 0.20567 | 0.24908 |
| 9 | 河南省人民政府办公厅关于贯彻落实国办发[2006]40号文件加快推进种子管理体制改革加强市场监管的通知 | 2007年4月 | 0.35866 | 0.37608 |
| 10 | 湖南省人民政府办公厅关于推进种子管理体制改革加强市场监管的实施意见 | 2007年5月 | 0.67376 | 0.85203 |
| 11 | 吉林省人民政府关于推进种子管理体制改革加强市场监管的实施意见 | 2007年4月 | 0.39007 | 0.49445 |
| 12 | 江苏省政府办公厅关于推进种子管理体制改革加强市场监管的实施意见 | 2006年11月 | 0.38906 | 0.48459 |
| 13 | 江西省人民政府办公厅关于推进种子管理体制改革加强市场监管的实施意见 | 2006年12月 | 0.63425 | 0.68434 |
| 14 | 辽宁省人民政府办公厅转发省农委关于推进种子管理体制改革加强市场监管实施意见的通知 | 2006年1月 | 0.41641 | 0.65228 |
| 15 | 内蒙古自治区人民政府办公厅转发国务院办公厅关于推进种子管理体制改革加强市场监管意见的通知 | 2006年12月 | 0.03951 | 0.02836 |
| 16 | 宁夏回族自治区人民政府办公厅关于推进我区种子管理体制改革加快种业发展的实施意见 | 2006年12月 | 0.62310 | 0.63009 |
| 17 | 青海省人民政府办公厅关于推进种子管理体制改革加强市场监管的通知 | 2006年11月 | 0.10132 | 0.06535 |
| 18 | 四川省人民政府办公厅关于推进种子管理体制改革加强市场监管的通知 | 2006年1月 | 0.25025 | 0.34649 |
| 19 | 山东省人民政府办公厅关于贯彻国办发[2006]40号文件进一步推进种子管理体制改革加强市场监管的通知 | 2006年11月 | 0.27457 | 0.30580 |
| 20 | 上海市人民政府办公厅贯彻国务院办公厅关于推进种子管理体制改革加强市场监管意见的实施意见 | 2006年12月 | 0.18845 | 0.20099 |
| 21 | 陕西省人民政府关于推进种子管理体制改革加强市场监管的实施意见 | 2006年12月 | 0.48531 | 0.54377 |
| 22 | 山西省人民政府办公厅关于推进种子管理体制改革加强市场监管的实施意见 | 2006年1月 | 0.48126 | 0.63132 |
| 23 | 天津市人民政府办公厅关于推进种子管理体制改革加强市场监管的实施意见 | 2006年11月 | 0.17832 | 0.18866 |
| 24 | 云南省人民政府办公厅关于贯彻落实国务院办公厅推进种子管理体制改革加强种子市场监管文件的实施意见 | 2006年1月 | 0.21783 | 0.25524 |
| 25 | 浙江省实施〈中华人民共和国种子法〉办法 | 2007年7月 | 0.19453 | 0.21085 |

Table C30:

| Provincial Documents Corresponding to Central Guideline #30:  国务院办公厅关于建立国家土地督察制度有关问题的通知 | | | | |
| --- | --- | --- | --- | --- |
| ID | Title of the document | Release Date | Straight Measure of  Content Coverage | Refined Content Coverage after Removing Formulaic Sentences |
| 1 | 北京市人民政府办公厅关于积极配合国家土地督察北京局开展土地督察工作的通知 | 2008年6月 | 0.07537 | 0.09703 |
| 2 | 福建省人民政府办公厅关于积极配合国家土地督察机构开展土地督察工作的通知 | 2008年7月 | 0.10363 | 0.12520 |
| 3 | 广西壮族自治区人民政府办公厅关于积极配合国家土地督察广州局开展土地督察工作的通知 | 2008年5月 | 0.09960 | 0.12050 |
| 4 | 贵州省人民政府办公厅关于积极配合国家土地督察机构开展土地督察工作的通知 | 2008年4月 | 0.09556 | 0.11424 |
| 5 | 黑龙江省人民政府办公厅关于积极配合国家土地督察沈阳局开展土地督察工作的通知 | 2007年11月 | 0.08883 | 0.10642 |
| 6 | 江苏省政府办公厅关于配合国家土地督察南京局开展土地督察工作的通知 | 2008年2月 | 0.06460 | 0.08294 |
| 7 | 江西省人民政府办公厅关于建立土地执法监管长效机制落实耕地保护共同责任的意见 | 2008年08月 | 0.11171 | 0.13146 |
| 8 | 辽宁省人民政府办公厅关于积极配合国家土地督察机构开展土地督察工作的通知 | 2007年8月 | 0.11036 | 0.13459 |
| 9 | 宁夏回族自治区人民政府办公厅关于配合国家土地督察机构开展土地督察工作的通知 | 2008年5月 | 0.09017 | 0.10955 |
| 10 | 青海省人民政府办公厅关于支持和配合国家土地督察西安局开展土地督察工作的通知 | 2008年2月 | 0.11306 | 0.14554 |
| 11 | 四川省人民政府办公厅关于支持国家土地督察工作的通知 | 2008年1月 | 0.13728 | 0.18623 |
| 12 | 上海市人民政府办公厅关于继续支持和配合国家土地督察上海局工作的通知 | 2008年7月 | 0.07672 | 0.10016 |
| 13 | 陕西省人民政府办公厅关于支持配合国家土地督察西安局开展土地督察工作的通知 | 2008年4月 | 0.07537 | 0.08607 |
| 14 | 天津市人民政府办公厅关于积极配合国家土地督察北京局开展土地督察工作的通知 | 2008年6月 | 0.08883 | 0.10955 |
| 15 | 西藏自治区人民政府办公厅关于支持国家土地督察工作的通知 | 2008年2月 | 0.07941 | 0.09077 |
| 16 | 新疆维吾尔自治区人民政府办公厅关于支持和配合国家土地督察西安局开展土地督察工作的通知 | 2008年5月 | 0.10902 | 0.13459 |

Table C31:

| Provincial Documents Corresponding to Central Guideline #31:  国务院关于加强节能工作的决定 | | | | |
| --- | --- | --- | --- | --- |
| ID | Title of the document | Release Date | Straight Measure of  Content Coverage | Refined Content Coverage after Removing Formulaic Sentences |
| 1 | 安徽省人民政府关于加强节能工作的实施意见 | 2006年12月 | 0.15965 | 0.20822 |
| 2 | 北京市人民政府贯彻落实国务院关于加强节能工作决定的意见 | 2007年1月 | 0.17570 | 0.23669 |
| 3 | 重庆市人民政府办公厅印发重庆市贯彻国务院关于加强节能工作决定的实施意见的通知 | 2006年1月 | 0.17614 | 0.23405 |
| 4 | 福建省人民政府关于加强节能工作的意见 | 2006年11月 | 0.35271 | 0.39062 |
| 5 | 广东省人民政府关于进一步加强我省节能工作的意见 | 2006年11月 | 0.18829 | 0.26568 |
| 6 | 甘肃省人民政府关于加强节能工作的意见 | 2006年8月 | 0.21996 | 0.31207 |
| 7 | 广西壮族自治区人民政府关于贯彻落实国务院加强节能工作决定的实施意见 | 2006年11月 | 0.27419 | 0.37797 |
| 8 | 贵州省人民政府关于贯彻国务院加强节能工作决定的意见 | 2006年9月 | 0.22213 | 0.27359 |
| 9 | 海南省人民政府办公厅关于加强建筑节能工作的通知 | 2007年3月 | 0.06204 | 0.07907 |
| 10 | 河北省人民政府关于加强节能工作的决定 | 2006年11月 | 0.31670 | 0.34317 |
| 11 | 黑龙江省人民政府关于加强节能工作的实施意见 | 2006年12月 | 0.23991 | 0.34792 |
| 12 | 河南省人民政府贯彻国务院关于加强节能工作决定的实施意见 | 2006年9月 | 0.40347 | 0.45704 |
| 13 | 湖北省人民政府关于加强节能工作的意见 | 2006年11月 | 0.39219 | 0.58303 |
| 14 | 湖南省人民政府办公厅关于印发《湖南省“十一五”节能工作实施方案》的通知 | 2006年1月 | 0.34751 | 0.37269 |
| 15 | 吉林省人民政府批转省发展改革委关于进一步加强节能工作实施方案的通知 | 2006年12月 | 0.20043 | 0.24776 |
| 16 | 江苏省政府关于加强节能工作的意见 | 2006年12月 | 0.24599 | 0.36848 |
| 17 | 江西省人民政府关于加强节能工作的实施意见 | 2006年1月 | 0.47115 | 0.53664 |
| 18 | 辽宁省人民政府办公厅转发省财政厅关于实施鼓励节能减排财税政策意见的通知 | 2007年12月 | 0.02039 | 0.02530 |
| 19 | 内蒙古自治区人民政府办公厅印发关于加强建筑节能工作若干规定的通知 | 2007年6月 | 0.03601 | 0.04270 |
| 20 | 青海省人民政府关于进一步加强节能减排工作的若干政策措施 | 2007年7月 | 0.03557 | 0.05061 |
| 21 | 四川省人民政府关于加强节能工作的决定 | 2007年1月 | 0.19219 | 0.25409 |
| 22 | 陕西省人民政府关于进一步加强节能工作的若干意见 | 2006年8月 | 0.14664 | 0.18714 |
| 23 | 山西省人民政府关于加强节能工作的决定 | 2006年11月 | 0.15315 | 0.20190 |
| 24 | 天津市人民政府关于加强节能工作的决定 | 2007年4月 | 0.20868 | 0.23827 |
| 25 | 西藏自治区人民政府关于加强节能工作的意见 | 2007年5月 | 0.16356 | 0.19821 |
| 26 | 云南省人民政府关于贯彻国务院加强节能工作决定的实施意见 | 2006年10月 | 0.30065 | 0.32789 |

Table C32:

| Provincial Documents Corresponding to Central Guideline #32:  国务院关于加强土地调控有关问题的通知 | | | | |
| --- | --- | --- | --- | --- |
| ID | Title of the document | Release Date | Straight Measure of  Content Coverage | Refined Content Coverage after Removing Formulaic Sentences |
| 1 | 安徽省人民政府转发国务院关于加强土地调控有关问题的通知皖政[2006]78号 | 2006年1月 | 0.02176 | 0.01277 |
| 2 | 北京市人民政府关于全面实行工业用地招标拍卖挂牌出让的实施意见 | 2007年6月 | 0.08912 | 0.12133 |
| 3 | 重庆市人民政府关于进一步加强当前土地管理工作的通知 | 2007年11月 | 0.10363 | 0.13410 |
| 4 | 福建省人民政府转发国务院关于加强土地调控有关问题的通知 | 2006年9月 | 0.01347 | 0.00766 |
| 5 | 广东省人民政府转发国务院关于加强土地调控有关问题的通知 | 2006年10月 | 0.02073 | 0.01022 |
| 6 | 广西壮族自治区人民政府转发国务院关于加强土地调控有关问题的通知 | 2006年12月 | 0.02902 | 0.03448 |
| 7 | 贵州省人民政府贯彻国务院关于加强土地调控有关问题通知的意见 | 2006年11月 | 0.09223 | 0.09834 |
| 8 | 海南省人民政府关于加强土地调控有关问题的实施意见 | 2006年11月 | 0.18446 | 0.19413 |
| 9 | 河北省人民政府办公厅关于贯彻落实国家土地调控政策的实施意见 | 2007年2月 | 0.25285 | 0.27586 |
| 10 | 黑龙江省人民政府关于印发黑龙江省地市级政府耕地保护责任目标考核办法的通知 | 2007年3月 | 0.04870 | 0.06513 |
| 11 | 河南省人民政府贯彻国务院关于加强土地调控有关问题通知的意见 | 2006年9月 | 0.55440 | 0.60536 |
| 12 | 湖北省人民政府办公厅转发省国土资源厅关于实施工业用地招标拍卖挂牌出让指导意见的通知 | 2007年8月 | 0.11295 | 0.14176 |
| 13 | 湖南省人民政府办公厅关于印发《市州政府土地管理和耕地保护责任目标考核办法》的通知 | 2007年4月 | 0.12332 | 0.16220 |
| 14 | 吉林省人民政府关于加强土地调控有关问题的实施意见 | 2006年1月 | 0.57306 | 0.68327 |
| 15 | 江苏省政府办公厅关于印发江苏省工业用地招标拍卖挂牌出让办法的通知 | 2007年2月 | 0.04974 | 0.06513 |
| 16 | 江西省人民政府贯彻国务院关于加强土地调控有关问题的意见 | 2006年12月 | 0.61865 | 0.73180 |
| 17 | 辽宁省人民政府关于加强土地管理和调控的实施意见 | 2007年2月 | 0.55233 | 0.59004 |
| 18 | 宁夏回族自治区人民政府办公厅关于违反土地管理规定行为处分办法的实施意见 | 2008年8月 | 0.07979 | 0.08940 |
| 19 | 四川省人民政府办公厅关于进一步做好被征地农民社会保障工作的通知 | 2008年4月 | 0.11503 | 0.12899 |
| 20 | 山东省人民政府关于贯彻国发[2006]31号文件加强土地调控的实施意见 | 2007年1月 | 0.32539 | 0.34483 |
| 21 | 陕西省人民政府办公厅关于制止违反国家土地调控政策招商引资的通知 | 2006年11月 | 0.04041 | 0.03576 |
| 22 | 山西省人民政府办公厅关于印发《山西省市级人民政府耕地保护责任目标考核办法》的通知 | 2007年8月 | 0.05285 | 0.07152 |
| 23 | 天津市人民政府办公厅转发市国土房管局拟定的天津市工业用地招标拍卖挂牌出让试行办法的通知 | 2007年4月 | 0.12228 | 0.13410 |
| 24 | 西藏自治区人民政府贯彻国务院关于加强土地调控有关问题的通知 | 2006年11月 | 0.24145 | 0.35888 |
| 25 | 云南省人民政府转发国务院关于加强土地调控有关问题文件的通知 | 2006年12月 | 0.49430 | 0.54151 |
| 26 | 浙江省人民政府办公厅关于全面实行工业用地招标拍卖挂牌出让实施意见的通知 | 2006年12月 | 0.10984 | 0.13027 |

Table C33:

| Provincial Documents Corresponding to Central Guideline #33:  国务院办公厅关于整顿和规范活禽经营市场秩序加强高致病性禽流感防控工作的意见 | | | | |
| --- | --- | --- | --- | --- |
| ID | Title of the document | Release Date | Straight Measure of  Content Coverage | Refined Content Coverage after Removing Formulaic Sentences |
| 1 | 安徽省人民政府办公厅关于切实加强高致病性禽流感防控工作的紧急通知 | 2007年12月 | 0.05663 | 0.07255 |
| 2 | 重庆市人民政府办公厅关于加强活禽经营市场管理进一步做好高致病性禽流感防控工作的通知 | 2007年2月 | 0.25186 | 0.40196 |
| 3 | 广东省人民政府办公厅转发国务院办公厅关于整顿和规范活禽经营市场秩序加强高致病性禽流感防控工作意见的通知 | 2007年3月 | 0.18629 | 0.22353 |
| 4 | 甘肃省人民政府办公厅关于整顿和规范活禽经营市场秩序加强高致病性禽流感防控工作的意见 | 2007年3月 | 0.50522 | 0.62745 |
| 5 | 广西壮族自治区人民政府办公厅关于整顿和规范活禽经营市场秩序加强高致病性禽流感防控工作的通知 | 2007年1月 | 0.56334 | 0.68039 |
| 6 | 贵州省人民政府办公厅关于加强活禽经营市场管理切实做好高致病性禽流感防控工作的意见 | 2006年12月 | 0.36960 | 0.75098 |
| 7 | 河北省人民政府办公厅关于整顿和规范活禽经营市场秩序加强高致病性禽流感防控工作的实施意见 | 2006年12月 | 0.18927 | 0.25490 |
| 8 | 大兴安岭地区行政公署，各市、县人民政府，省政府各直属单位：为贯彻落实《国务院办公厅关于整顿和规范活禽经营市场秩序加强高致病性禽流感防控工作的意见》精神，切实加强全省活禽经营市场监管，努力消除高致病性禽流感隐患，经省政府领导同意，现就有关工作通知如下： | 2007年1月 | 0.64978 | 0.71373 |
| 9 | 河南省人民政府办公厅关于整顿规范活禽经营市场秩序加强高致病性禽流感防控工作的意见 | 2006年12月 | 0.70492 | 0.80196 |
| 10 | 湖南省人民政府办公厅关于加强活禽经营市场管理做好高致病性禽流感防控工作的通知 | 2007年6月 | 0.27422 | 0.31961 |
| 11 | 吉林省人民政府办公厅关于整顿和规范活禽经营市场秩序加强高致病性禽流感防控工作有关问题的通知 | 2007年1月 | 0.46796 | 0.69412 |
| 12 | 江苏省政府办公厅关于整顿和规范活禽经营市场秩序加强高致病性禽流感防控工作的通知 | 2006年12月 | 0.75261 | 0.87451 |
| 13 | 辽宁省人民政府办公厅印发关于整顿和规范活禽经营市场秩序加强高致病性禽流感防控工作实施意见的通知 | 2006年12月 | 0.75708 | 0.82549 |
| 14 | 内蒙古自治区人民政府办公厅转发国务院办公厅关于整顿和规范活禽经营市场秩序加强高致病性禽流感防控工作意见的通知 | 2006年12月 | 0.09687 | 0.09020 |
| 15 | 青海省人民政府办公厅关于整顿和规范活禽经营市场秩序加强高致病性禽流感防控工作的意见 | 2007年4月 | 0.58271 | 0.76667 |
| 16 | 陕西省人民政府办公厅关于整顿和规范活禽经营市场秩序加强高致病性禽流感防控工作的通知 | 2007年1月 | 0.56334 | 0.84510 |

Table C34:

| Provincial Documents Corresponding to Central Guideline #34:  国务院办公厅关于规范国有土地使用权出让收支管理的通知 | | | | |
| --- | --- | --- | --- | --- |
| ID | Title of the document | Release Date | Straight Measure of  Content Coverage | Refined Content Coverage after Removing Formulaic Sentences |
| 1 | 安徽省人民政府办公厅转发国务院办公厅关于规范国有土地使用权出让收支管理的通知 | 2007年4月 | 0.01880 | 0.01379 |
| 2 | 重庆市人民政府办公厅关于规范国有土地使用权出让收支管理的通知 | 2007年3月 | 0.20607 | 0.33090 |
| 3 | 甘肃省人民政府令 | 2007年12月 | 0.25669 | 0.29846 |
| 4 | 广西壮族自治区人民政府办公厅关于规范国有土地使用权出让收支管理的通知 | 2007年7月 | 0.77730 | 0.89132 |
| 5 | 海南省人民政府办公厅关于国有土地使用权出让收支纳入预算管理后政府预算编报有关问题的通知 | 2007年1月 | 0.01229 | 0.00973 |
| 6 | 江西省人民政府办公厅贯彻国务院办公厅关于规范国有土地使用权出让收支管理的实施意见 | 2007年3月 | 0.69414 | 0.82725 |
| 7 | 四川省人民政府办公厅关于规范国有土地使用权出让收支管理的通知 | 2007年6月 | 0.17209 | 0.19221 |
| 8 | 山东省人民政府办公厅关于贯彻国办发[2006]100号文件进一步规范国有土地使用权出让收支管理的意见 | 2007年6月 | 0.85611 | 0.82563 |
| 9 | 云南省人民政府办公厅转发国务院办公厅关于规范国有土地使用权出让收支管理文件的通知 | 2007年8月 | 0.02458 | 0.02514 |

Table C35:

| Provincial Documents Corresponding to Central Guideline #35:  国务院办公厅关于进一步加强药品安全监管工作的通知 | | | | |
| --- | --- | --- | --- | --- |
| ID | Title of the document | Release Date | Straight Measure of  Content Coverage | Refined Content Coverage after Removing Formulaic Sentences |
| 1 | 安徽省人民政府办公厅转发国务院办公厅关于进一步加强药品安全监管工作的通知 | 2007年5月 | 0.04922 | 0.04681 |
| 2 | 北京市人民政府办公厅关于进一步加强药品安全监管工作的通知 | 2007年7月 | 0.35459 | 0.40182 |
| 3 | 重庆市人民政府办公厅贯彻落实国务院办公厅关于进一步加强药品安全监管工作通知的意见 | 2007年8月 | 0.23378 | 0.27568 |
| 4 | 福建省人民政府办公厅关于进一步加强药品安全监管工作的意见 | 2007年9月 | 0.43289 | 0.56827 |
| 5 | 广东省人民政府办公厅转发国务院办公厅关于进一步加强药品安全监管工作的通知 | 2007年6月 | 0.07606 | 0.14434 |
| 6 | 甘肃省人民政府办公厅批转省食品药品监管局关于加强药品安全监管工作意见的通知 | 2007年1月 | 0.38814 | 0.47074 |
| 7 | 广西壮族自治区人民政府办公厅关于进一步加强药品安全监管工作的通知 | 2007年7月 | 0.42841 | 0.47984 |
| 8 | 贵州省人民政府办公厅关于进一步加强药品安全监管工作的通知 | 2007年6月 | 0.64094 | 0.81274 |
| 9 | 海南省人民政府办公厅关于进一步加强药品安全监管工作意见的通知 | 2007年7月 | 0.17338 | 0.20026 |
| 10 | 各省辖市人民政府,省人民政府各部门: | 2007年6月 | 0.53244 | 0.79454 |
| 11 | 湖北省人民政府办公厅关于进一步加强药品安全监管工作的通知 | 2007年6月 | 0.30537 | 0.35111 |
| 12 | 江西省人民政府办公厅关于进一步加强食品药品安全监管工作的通知 | 2007年8月 | 0.64430 | 0.74122 |
| 13 | 辽宁省人民政府办公厅关于进一步加强药品安全监管工作的通知 | 2007年6月 | 0.19128 | 0.26528 |
| 14 | 内蒙古自治区人民政府办公厅关于转发国办发[2007]18号文件的通知 | 2007年6月 | 0.14541 | 0.18596 |
| 15 | 宁夏回族自治区人民政府办公厅关于进一步加强药品安全监管工作的通知 | 2007年8月 | 0.72819 | 0.79714 |
| 16 | 青海省人民政府办公厅关于进一步加强药品安全监管工作的通知 | 2007年5月 | 0.33893 | 0.39142 |
| 17 | 四川省人民政府办公厅关于加强药品安全监管工作的通知 | 2007年6月 | 0.27852 | 0.28869 |
| 18 | 山东省人民政府办公厅关于贯彻落实国办发[2007]18号文件进一步加强药品安全监管工作的通知 | 2007年5月 | 0.39933 | 0.43693 |
| 19 | 上海市人民政府办公厅印发关于进一步加强药品市场秩序专项整治工作意见的通知 | 2007年8月 | 0.38367 | 0.42523 |
| 20 | 陕西省人民政府办公厅关于进一步加强药品安全监管工作的通知 | 2007年6月 | 0.65996 | 0.72952 |
| 21 | 西藏自治区人民政府办公厅关于进一步加强药品安全监管工作的通知 | 2007年5月 | 0.21029 | 0.24187 |
| 22 | 新疆维吾尔自治区人民政府办公厅关于进一步加强药品安全监管工作的实施意见 | 2007年6月 | 0.45414 | 0.51365 |
| 23 | 云南省人民政府办公厅转发国务院办公厅关于进一步加强药品安全监管工作文件的通知 | 2007年5月 | 0.04362 | 0.03771 |

Table C36:

| Provincial Documents Corresponding to Central Guideline #36:  国务院关于印发节能减排综合性工作方案的通知 | | | | |
| --- | --- | --- | --- | --- |
| ID | Title of the document | Release Date | Straight Measure of  Content Coverage | Refined Content Coverage after Removing Formulaic Sentences |
| 1 | 安徽省人民政府关于印发全省节能减排工作方案的通知 | 2007年7月 | 0.11702 | 0.13186 |
| 2 | 重庆市人民政府办公厅关于印发重庆市节能减排综合性工作方案的通知 | 2007年1月 | 0.16327 | 0.17707 |
| 3 | 福建省人民政府关于印发福建省节能减排综合性工作方案的通知 | 2007年6月 | 0.20444 | 0.28867 |
| 4 | 广东省人民政府印发广东省节能减排综合性工作方案的通知 | 2007年7月 | 0.29579 | 0.36991 |
| 5 | 甘肃省人民政府关于印发节能减排综合实施方案的通知 | 2007年8月 | 0.32701 | 0.39063 |
| 6 | 广西壮族自治区人民政府关于印发广西壮族自治区节能减排实施方案的通知 | 2007年8月 | 0.52868 | 0.52884 |
| 7 | 贵州省人民政府关于印发节能减排综合性工作方案的通知 | 2007年7月 | 0.51110 | 0.50907 |
| 8 | 海南省人民政府关于印发海南省节能减排综合性工作方案的通知 | 2007年7月 | 0.20236 | 0.24017 |
| 9 | 河北省人民政府关于印发节能减排综合性实施方案的通知 | 2007年8月 | 0.27266 | 0.27761 |
| 10 | 黑龙江省人民政府关于印发黑龙江省节能减排综合性工作方案的通知 | 2007年9月 | 0.18918 | 0.21168 |
| 11 | 河南省人民政府关于印发河南省节能减排实施方案的通知 | 2007年6月 | 0.13691 | 0.14504 |
| 12 | 省人民政府关于印发节能减排综合性工作方案的通知 | 2007年8月 | 0.04440 | 0.04073 |
| 13 | 湖南省人民政府关于印发《湖南省节能减排综合性工作实施方案》的通知 | 2007年11月 | 0.42946 | 0.46598 |
| 14 | 吉林省人民政府关于印发节能减排综合性工作方案的通知 | 2007年9月 | 0.21785 | 0.28138 |
| 15 | 江苏省政府关于印发江苏省节能减排工作实施意见的通知 | 2007年6月 | 0.32539 | 0.34895 |
| 16 | 江西省人民政府关于印发江西省节能减排综合性工作方案的通知 | 2007年10月 | 0.41073 | 0.47704 |
| 17 | 辽宁省人民政府关于印发辽宁省节能减排综合性工作方案的通知 | 2008年8月 | 0.26920 | 0.34448 |
| 18 | 宁夏回族自治区人民政府关于进一步加强重点领域节能减排工作的实施意见 | 2008年7月 | 0.04255 | 0.04403 |
| 19 | 青海省人民政府关于进一步加强节能减排工作的若干政策措施 | 2007年7月 | 0.02359 | 0.02802 |
| 20 | 四川省人民政府关于印发《四川省节能减排综合性工作方案》的通知 | 2007年6月 | 0.26480 | 0.27926 |
| 21 | 山东省人民政府关于印发节能减排综合性工作实施方案的通知 | 2007年6月 | 0.57932 | 0.59901 |
| 22 | 上海市人民政府关于印发《上海市节能减排工作实施方案》的通知 | 2007年8月 | 0.10708 | 0.15093 |
| 23 | 陕西省人民政府关于印发陕西省节能减排综合性工作方案的通知 | 2007年7月 | 0.18270 | 0.22204 |
| 24 | 山西省人民政府关于印发山西省节能减排综合性工作方案的通知 | 2007年9月 | 0.27983 | 0.31316 |
| 25 | 天津市人民政府关于印发天津市节能减排工作实施方案的通知 | 2007年12月 | 0.18016 | 0.20603 |
| 26 | 西藏自治区人民政府关于印发西藏自治区节能减排综合性工作方案的通知 | 2008年1月 | 0.13275 | 0.12950 |
| 27 | 云南省人民政府关于印发云南省节能减排综合性工作方案和云南省节能减排工作任务分解方案的通知 | 2007年7月 | 0.20375 | 0.24559 |
| 28 | 浙江省人民政府关于进一步加强污染减排工作的通知 | 2007年6月 | 0.06568 | 0.07393 |

Table C37:

| Provincial Documents Corresponding to Central Guideline #37:  国务院办公厅关于严格执行公共建筑空调温度控制标准的通知 | | | | |
| --- | --- | --- | --- | --- |
| ID | Title of the document | Release Date | Straight Measure of  Content Coverage | Refined Content Coverage after Removing Formulaic Sentences |
| 1 | 福建省人民政府办公厅关于严格执行公共建筑空调温度控制标准的通知 | 2007年7月 | 0.37149 | 0.49063 |
| 2 | 海南省人民政府办公厅关于严格执行公共建筑空调温度控制标准的通知 | 2007年8月 | 0.27214 | 0.42188 |
| 3 | 湖北省人民政府办公厅关于认真落实公共建筑空调温度控制标准有关工作的通知 | 2007年6月 | 0.58963 | 0.78750 |
| 4 | 湖南省人民政府办公厅关于认真做好公共建筑空调节能工作的通知 | 2007年8月 | 0.40389 | 0.42188 |
| 5 | 吉林省人民政府办公厅关于严格执行公共建筑空调温度控制标准的通知 | 2007年6月 | 0.36717 | 0.35313 |
| 6 | 江西省人民政府办公厅转发国务院办公厅关于严格执行公共建筑空调温度控制标准的通知 | 2007年7月 | 0.07775 | 0.17188 |
| 7 | 宁夏回族自治区人民政府办公厅转发国务院办公厅关于严格执行公共建筑空调温度控制标准的通知 | 2007年6月 | 0.04968 | 0.05625 |
| 8 | 山东省人民政府办公厅关于贯彻国办发[2007]42号文件严格执行公共建筑空调温度控制标准的通知 | 2007年7月 | 0.24622 | 0.40000 |
| 9 | 陕西省人民政府办公厅关于严格执行公共建筑空调温度控制标准的通知 | 2007年9月 | 0.34125 | 0.43125 |

Table C38:

| Provincial Documents Corresponding to Central Guideline #38:  国务院办公厅关于进一步加强气象灾害防御工作的意见 | | | | |
| --- | --- | --- | --- | --- |
| ID | Title of the document | Release Date | Straight Measure of  Content Coverage | Refined Content Coverage after Removing Formulaic Sentences |
| 1 | 安徽省人民政府办公厅转发国务院办公厅关于进一步加强气象灾害防御工作意见的通知 | 2007年9月 | 0.05638 | 0.06435 |
| 2 | 北京市人民政府办公厅关于切实加强气象灾害防御工作的实施意见 | 2007年11月 | 0.37517 | 0.36336 |
| 3 | 重庆市人民政府办公厅关于加强安全气象预警预报信息工作的通知 | 2007年7月 | 0.08121 | 0.10068 |
| 4 | 福建省人民政府办公厅转发国务院办公厅关于进一步加强气象灾害防御工作意见的通知 | 2007年8月 | 0.09530 | 0.08933 |
| 5 | 广东省人民政府办公厅转发国务院办公厅关于进一步加强气象灾害防御工作意见的通知 | 2007年8月 | 0.01208 | 0.01060 |
| 6 | 甘肃省人民政府办公厅关于进一步加强气象灾害防御工作的通知 | 2007年1月 | 0.64161 | 0.69871 |
| 7 | 广西壮族自治区人民政府办公厅转发国务院办公厅关于进一步加强气象灾害防御工作意见的通知 | 2007年11月 | 0.15906 | 0.14459 |
| 8 | 河北省人民政府办公厅关于进一步加强气象灾害防御工作的通知 | 2007年9月 | 0.07651 | 0.08554 |
| 9 | 黑龙江省人民政府办公厅关于进一步加强气象灾害防御工作的意见 | 2007年11月 | 0.62282 | 0.61620 |
| 10 | 河南省人民政府关于加强气象灾害防御工作的意见 | 2007年1月 | 0.23557 | 0.26192 |
| 11 | 湖北省人民政府办公厅关于进一步加强气象灾害防御工作的意见 | 2007年1月 | 0.55772 | 0.60939 |
| 12 | 湖南省人民政府办公厅关于进一步加强气象灾害防御工作的意见 | 2007年12月 | 0.42550 | 0.50795 |
| 13 | 吉林省人民政府办公厅关于进一步加强气象灾害防御工作的实施意见 | 2007年9月 | 0.68054 | 0.75927 |
| 14 | 江苏省政府办公厅关于进一步加强气象灾害防御工作的意见 | 2007年8月 | 0.55235 | 0.56851 |
| 15 | 江西省人民政府办公厅关于进一步加强气象灾害防御工作的实施意见 | 2007年12月 | 0.64362 | 0.67752 |
| 16 | 辽宁省人民政府办公厅关于进一步加强气象灾害防御工作的实施意见 | 2007年12月 | 0.22685 | 0.24451 |
| 17 | 内蒙古自治区人民政府办公厅关于进一步加强气象灾害防御工作的实施意见 | 2007年12月 | 0.53221 | 0.61923 |
| 18 | 宁夏回族自治区人民政府办公厅关于进一步加强气象灾害防御工作的意见 | 2007年9月 | 0.65235 | 0.78350 |
| 19 | 青海省人民政府办公厅贯彻落实《国务院办公厅关于进一步加强气象灾害防御工作的意见》的实施意见 | 2007年9月 | 0.49262 | 0.60333 |
| 20 | 四川省人民政府办公厅关于进一步加强气象灾害防御工作的意见 | 2007年8月 | 0.34832 | 0.38607 |
| 21 | 山东省人民政府办公厅关于贯彻国办发[2007]49号文件进一步加强我省气象灾害防御工作的意见 | 2007年9月 | 0.58591 | 0.59500 |
| 22 | 陕西省人民政府办公厅关于进一步加强气象灾害防御工作的意见 | 2007年9月 | 0.54094 | 0.61317 |
| 23 | 山西省人民政府办公厅关于贯彻落实《国务院办公厅关于进一步加强气象灾害防御工作的意见》的实施意见 | 2007年9月 | 0.84094 | 0.91294 |
| 24 | 天津市人民政府办公厅关于进一步加强我市气象灾害防御工作的实施意见 | 2007年12月 | 0.60604 | 0.58062 |
| 25 | 西藏自治区人民政府关于贯彻国务院办公厅关于进一步加强气象灾害防御工作意见的实施意见 | 2007年8月 | 0.50336 | 0.61241 |
| 26 | 云南省人民政府办公厅贯彻国务院办公厅关于进一步加强气象灾害防御工作意见的通知 | 2008年1月 | 0.56174 | 0.68736 |

Table C39:

| Provincial Documents Corresponding to Central Guideline #39:  国务院办公厅关于建立政府强制采购节能产品制度的通知 | | | | |
| --- | --- | --- | --- | --- |
| ID | Title of the document | Release Date | Straight Measure of  Content Coverage | Refined Content Coverage after Removing Formulaic Sentences |
| 1 | 广东省人民政府办公厅转发国务院办公厅关于建立政府强制采购节能产品制度的通知 | 2007年1月 | 0.08596 | 0.09163 |
| 2 | 内蒙古自治区人民政府办公厅关于转发国办发〔2007〕51号文件的通知 | 2007年9月 | 0.05206 | 0.05529 |
| 3 | 青海省人民政府办公厅转发省经委、省财政厅关于建立政府强制采购节能产品制度意见的通知 | 2007年12月 | 0.20823 | 0.30648 |
| 4 | 山东省人民政府办公厅关于转发省财政厅等部门山东省节能产品政府采购实施意见的通知 | 2008年12月 | 0.24213 | 0.37125 |
| 5 | 西藏自治区人民政府办公厅贯彻落实关于建立政府强制采购节能产品制度意见的通知 | 2008年1月 | 0.13801 | 0.23381 |
| 6 | 浙江省人民政府办公厅关于建立政府优先强制采购节能环保和自主创新产品制度的通知 | 2008年4月 | 0.28208 | 0.29226 |

Table C40:

| Provincial Documents Corresponding to Central Guideline #40:  国务院关于加强产品质量和食品安全工作的通知 | | | | |
| --- | --- | --- | --- | --- |
| ID | Title of the document | Release Date | Straight Measure of  Content Coverage | Refined Content Coverage after Removing Formulaic Sentences |
| 1 | 安徽省人民政府办公厅关于印发安徽省产品质量和食品安全专项整治行动方案的通知 | 2007年9月 | 0.18562 | 0.19674 |
| 2 | 北京市人民政府办公厅关于印发本市产品质量和食品安全专项整治行动方案的通知 | 2007年9月 | 0.21406 | 0.22121 |
| 3 | 重庆市人民政府办公厅关于印发全市产品质量和食品安全专项整治行动方案的通知 | 2007年9月 | 0.19352 | 0.19764 |
| 4 | 福建省人民政府办公厅关于印发福建省产品质量和食品安全专项整治行动方案的通知 | 2007年9月 | 0.19826 | 0.20852 |
| 5 | 2007年甘肃省产品质量和食品安全专项整治行动方案 | 2007年11月 | 0.19668 | 0.20399 |
| 6 | 广西壮族自治区人民政府办公厅关于印发广西壮族自治区产品质量和食品安全专项整治行动方案的通知 | 2007年9月 | 0.23934 | 0.24751 |
| 7 | 贵州省人民政府办公厅关于印发全省产品质量和食品安全专项整治行动方案的通知 | 2007年9月 | 0.21327 | 0.21487 |
| 8 | 海南省人民政府办公厅关于印发海南省产品质量和食品安全专项整治工作总体方案的通知 | 2007年9月 | 0.19352 | 0.19764 |
| 9 | 河北省产品质量和食品安全专项整治行动方案 | 2007年8月 | 0.21485 | 0.22756 |
| 10 | 黑龙江省人民政府转发国务院关于加强产品质量和食品安全工作通知的通知 | 2007年9月 | 0.02528 | 0.01632 |
| 11 | 湖北省人民政府办公厅关于印发全省产品质量和食品安全专项整治行动方案的通知 | 2007年9月 | 0.18720 | 0.20218 |
| 12 | 湖南省人民政府办公厅关于印发湖南省产品质量和食品安全专项整治行动方案的通知 | 2007年9月 | 0.12717 | 0.13962 |
| 13 | 吉林省人民政府办公厅关于印发吉林省产品质量和食品安全专项整治行动实施方案的通知 | 2007年8月 | 0.18325 | 0.18948 |
| 14 | 江苏省政府办公厅关于印发江苏省产品质量和食品安全专项整治行动方案的通知 | 2007年8月 | 0.18246 | 0.18132 |
| 15 | 江西省人民政府办公厅关于印发全省产品质量和食品安全专项整治行动方案的通知 | 2007年9月 | 0.19905 | 0.20127 |
| 16 | 辽宁省人民政府办公厅关于印发全省产品质量和食品安全专项整治行动方案的通知 | 2007年9月 | 0.14929 | 0.15866 |
| 17 | 内蒙古自治区人民政府转发国务院关于加强产品质量和食品安全工作的通知 | 2007年8月 | 0.02686 | 0.02176 |
| 18 | 宁夏回族自治区人民政府关于进一步加强产品质量和食品安全工作的意见 | 2007年9月 | 0.53239 | 0.66818 |
| 19 | 青海省人民政府办公厅关于印发产品质量和食品安全专项整治行动方案的通知 | 2007年9月 | 0.22038 | 0.22303 |
| 20 | 四川省人民政府办公厅关于印发《四川省产品质量和食品安全专项整治行动方案》的通知 | 2007年8月 | 0.20063 | 0.21396 |
| 21 | 山东省人民政府办公厅关于印发全省产品质量和食品安全专项整治行动方案的通知 | 2007年8月 | 0.22117 | 0.23572 |
| 22 | 上海市人民政府办公厅关于印发上海市产品质量和食品安全专项整治行动方案的通知 | 2007年9月 | 0.22038 | 0.22756 |
| 23 | 陕西省人民政府办公厅关于印发陕西省产品质量和食品安全专项整治行动方案的通知 | 2007年8月 | 0.16983 | 0.17588 |
| 24 | 天津市人民政府办公厅转发市产品质量和食品安全领导小组办公室拟定的天津市产品质量和食品安全专项整治行动方案的通知 | 2007年9月 | 0.19905 | 0.21124 |
| 25 | 西藏自治区人民政府办公厅关于成立西藏自治区产品质量和食品安全领导小组的通知 | 2007年8月 | 0.01501 | 0.01360 |
| 26 | 新疆维吾尔自治区人民政府办公厅关于印发自治区产品质量和食品安全专项整治行动方案的通知 | 2007年9月 | 0.15640 | 0.16228 |
| 27 | 云南省人民政府办公厅关于印发云南省产品质量和食品安全专项整治行动工作方案的通知 | 2007年9月 | 0.24329 | 0.24297 |
| 28 | 浙江省食品安全委员会办公室、浙江省食品药品监管局关于进一步加强食品安全工作的通知 | 2007年9月 | 0.09874 | 0.10789 |

Table C41:

| Provincial Documents Corresponding to Central Guideline #41:  国务院办公厅关于严格执行有关农村集体建设用地法律和政策的通知 | | | | |
| --- | --- | --- | --- | --- |
| ID | Title of the document | Release Date | Straight Measure of  Content Coverage | Refined Content Coverage after Removing Formulaic Sentences |
| 1 | 重庆市人民政府办公厅转发国务院办公厅关于严格执行有关农村集体建设用地法律和政策通知的通知 | 2008年3月 | 0.06342 | 0.06442 |
| 2 | 福建省人民政府办公厅转发国务院办公厅关于严格执行有关农村集体建设用地法律和政策的通知 | 2008年3月 | 0.08088 | 0.09918 |
| 3 | 贵州省人民政府办公厅转发省监察厅等部门关于落实违反土地管理规定行为处分办法意见的通知 | 2009年8月 | 0.04412 | 0.04499 |
| 4 | 吉林省人民政府办公厅关于严格执行有关农村集体建设用地法律和政策的实施意见 | 2008年3月 | 0.10110 | 0.10941 |
| 5 | 江西省人民政府贯彻落实国务院关于促进节约集约用地及严格执行有关农村集体建设用地法律和政策的通知 | 2008年 | 0.20129 | 0.20245 |
| 6 | 宁夏回族自治区人民政府办公厅关于严格执行有关农村集体建设用地法律政策的通知 | 2008年3月 | 0.28309 | 0.41104 |
| 7 | 青海省人民政府办公厅转发省国土资源厅等部门关于贯彻落实严格执行农村集体建设用地法律和政策意见的通知 | 2008年3月 | 0.29320 | 0.35890 |
| 8 | 四川省人民政府关于促进节约集约用地严格执行有关农村集体建设用地法律和政策的通知 | 2008年3月 | 0.17647 | 0.18200 |
| 9 | 山东省人民政府办公厅关于贯彻国办发〔2007〕71号文件严格执行农村集体建设用地法律和政策的通知 | 2008年4月 | 0.07261 | 0.05726 |
| 10 | 云南省人民政府办公厅转发国务院办公厅关于严格执行有关农村集体建设用地法律和政策文件的通知 | 2008年5月 | 0.04504 | 0.05419 |

Table C42:

| Provincial Documents Corresponding to Central Guideline #42:  国务院办公厅关于限制生产销售使用塑料购物袋的通知 | | | | |
| --- | --- | --- | --- | --- |
| ID | Title of the document | Release Date | Straight Measure of  Content Coverage | Refined Content Coverage after Removing Formulaic Sentences |
| 1 | 重庆市人民政府办公厅关于限制生产销售使用塑料购物袋的通知 | 2008年5月 | 0.09284 | 0.14197 |
| 2 | 福建省人民政府办公厅转发国务院办公厅关于限制生产销售使用塑料购物袋的通知 | 2008年3月 | 0.33422 | 0.32761 |
| 3 | 广东省人民政府办公厅关于限制生产销售使用塑料购物袋的实施意见 | 2008年5月 | 0.21220 | 0.35101 |
| 4 | 江西省人民政府办公厅关于限制生产销售使用塑料购物袋的通知 | 2008年4月 | 0.38992 | 0.76755 |
| 5 | 宁夏回族自治区人民政府办公厅关于印发宁夏回族自治区限制生产销售使用塑料购物袋管理办法的通知 | 2008年5月 | 0.60212 | 0.51014 |
| 6 | 青海省人民政府办公厅转发省商务厅关于在全省范围内限制生产销售使用塑料购物袋意见的通知 | 2008年5月 | 0.49204 | 0.81435 |
| 7 | 上海市人民政府办公厅贯彻国务院办公厅关于限制生产销售使用塑料购物袋通知的通知 | 2008年5月 | 0.16048 | 0.51170 |
| 8 | 西藏自治区人民政府办公厅转发国务院办公厅关于限制生产销售使用塑料购物袋的通知的通知 | 2008年2月 | 0.04509 | 0.07488 |
| 9 | 云南省人民政府办公厅关于印发云南省限制和禁止生产销售使用塑料购物袋的实施意见的通知 | 2008年5月 | 0.22281 | 0.30889 |
